# Supplementary material for: ScGAI is a key regulator of culm development in sugarcane
Source: J Exp Bot. 2018 May 21;69(16):3823–37. doi: 10.1093/jxb/ery180 (PMC6054169; doi:10.1093/jxb/ery180)
Supplement: Supplementary Figures and Tables [file ery180_suppl_supplementary_figures_and_tables.docx]

**Supplementary data for**

**ScGAI is a key regulator of culm development in sugarcane**

Rafael Garcia Tavares, Prakash Lakshmanan, Edgar Peiter, Anthony O’Connell, Camila Caldana, Renato Vicentini, José Sérgio Soares, Marcelo Menossi*

correspondence to: [menossi@lgf.ib.unicamp.br](mailto:menossi@lgf.ib.unicamp.br)

**
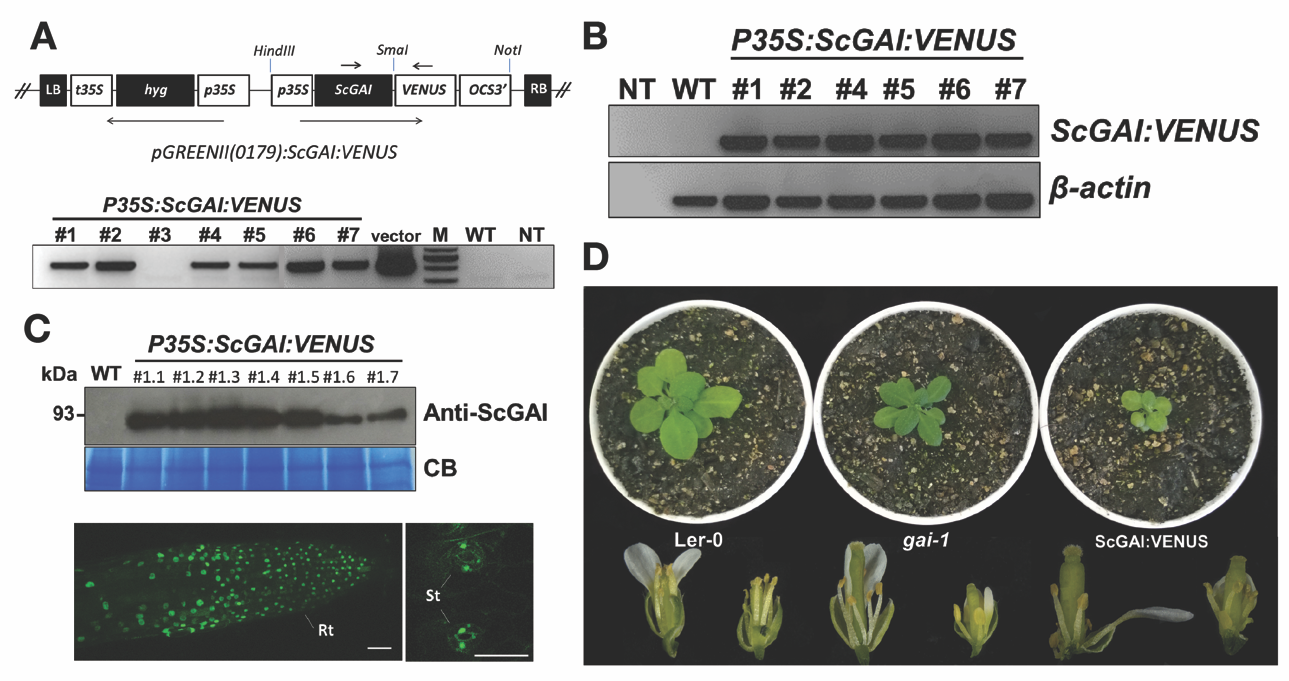
**

**Fig. S1. ScGAI:VENUS fusion protein repressed the GA-responses in transgenic Arabidopsis.**

**A.** Schematic representation of the pGREENII(179):ScGAI:VENUS fusion construct. LB and RB: left and right borders on the T-DNA, respectively; P35S: 35S promoter; T35S: 35S terminator; OCS3’: octopine synthase terminator; Hyg: hygromycin resistance gene. Below, *ScGAI* transgene integration in transgenic plants using specific primers as indicated with an arrow in the diagram. **B.** RT-PCR analysis of *35S:ScGAI:VENUS* expressionin transgenic plants. The β-actin gene was used as a loading control. WT: wild type; NT: non-template. **C.** Above, immunoblot analysis of ScGAI:VENUS fusion protein from T2 generation . WT: wild type; CB: Commassie blue-stained membrane as loading control. Below, nuclear fluorescent signal of ScGAI:VENUS fusion protein in root tip (Rt) and stomata (St) visualized by confocal laser microscopy. Bars = 50 µm. **D.** 2-week-old ScGAI:VENUS transgenic Arabidopsis showing a dwarf phenotype in comparison with wild-type (Ler-0) and gibberellin-insensitive (*gai-1*) mutant, and floral buds with short stamen filaments in *gai-1* and ScGAI:VENUS plants.


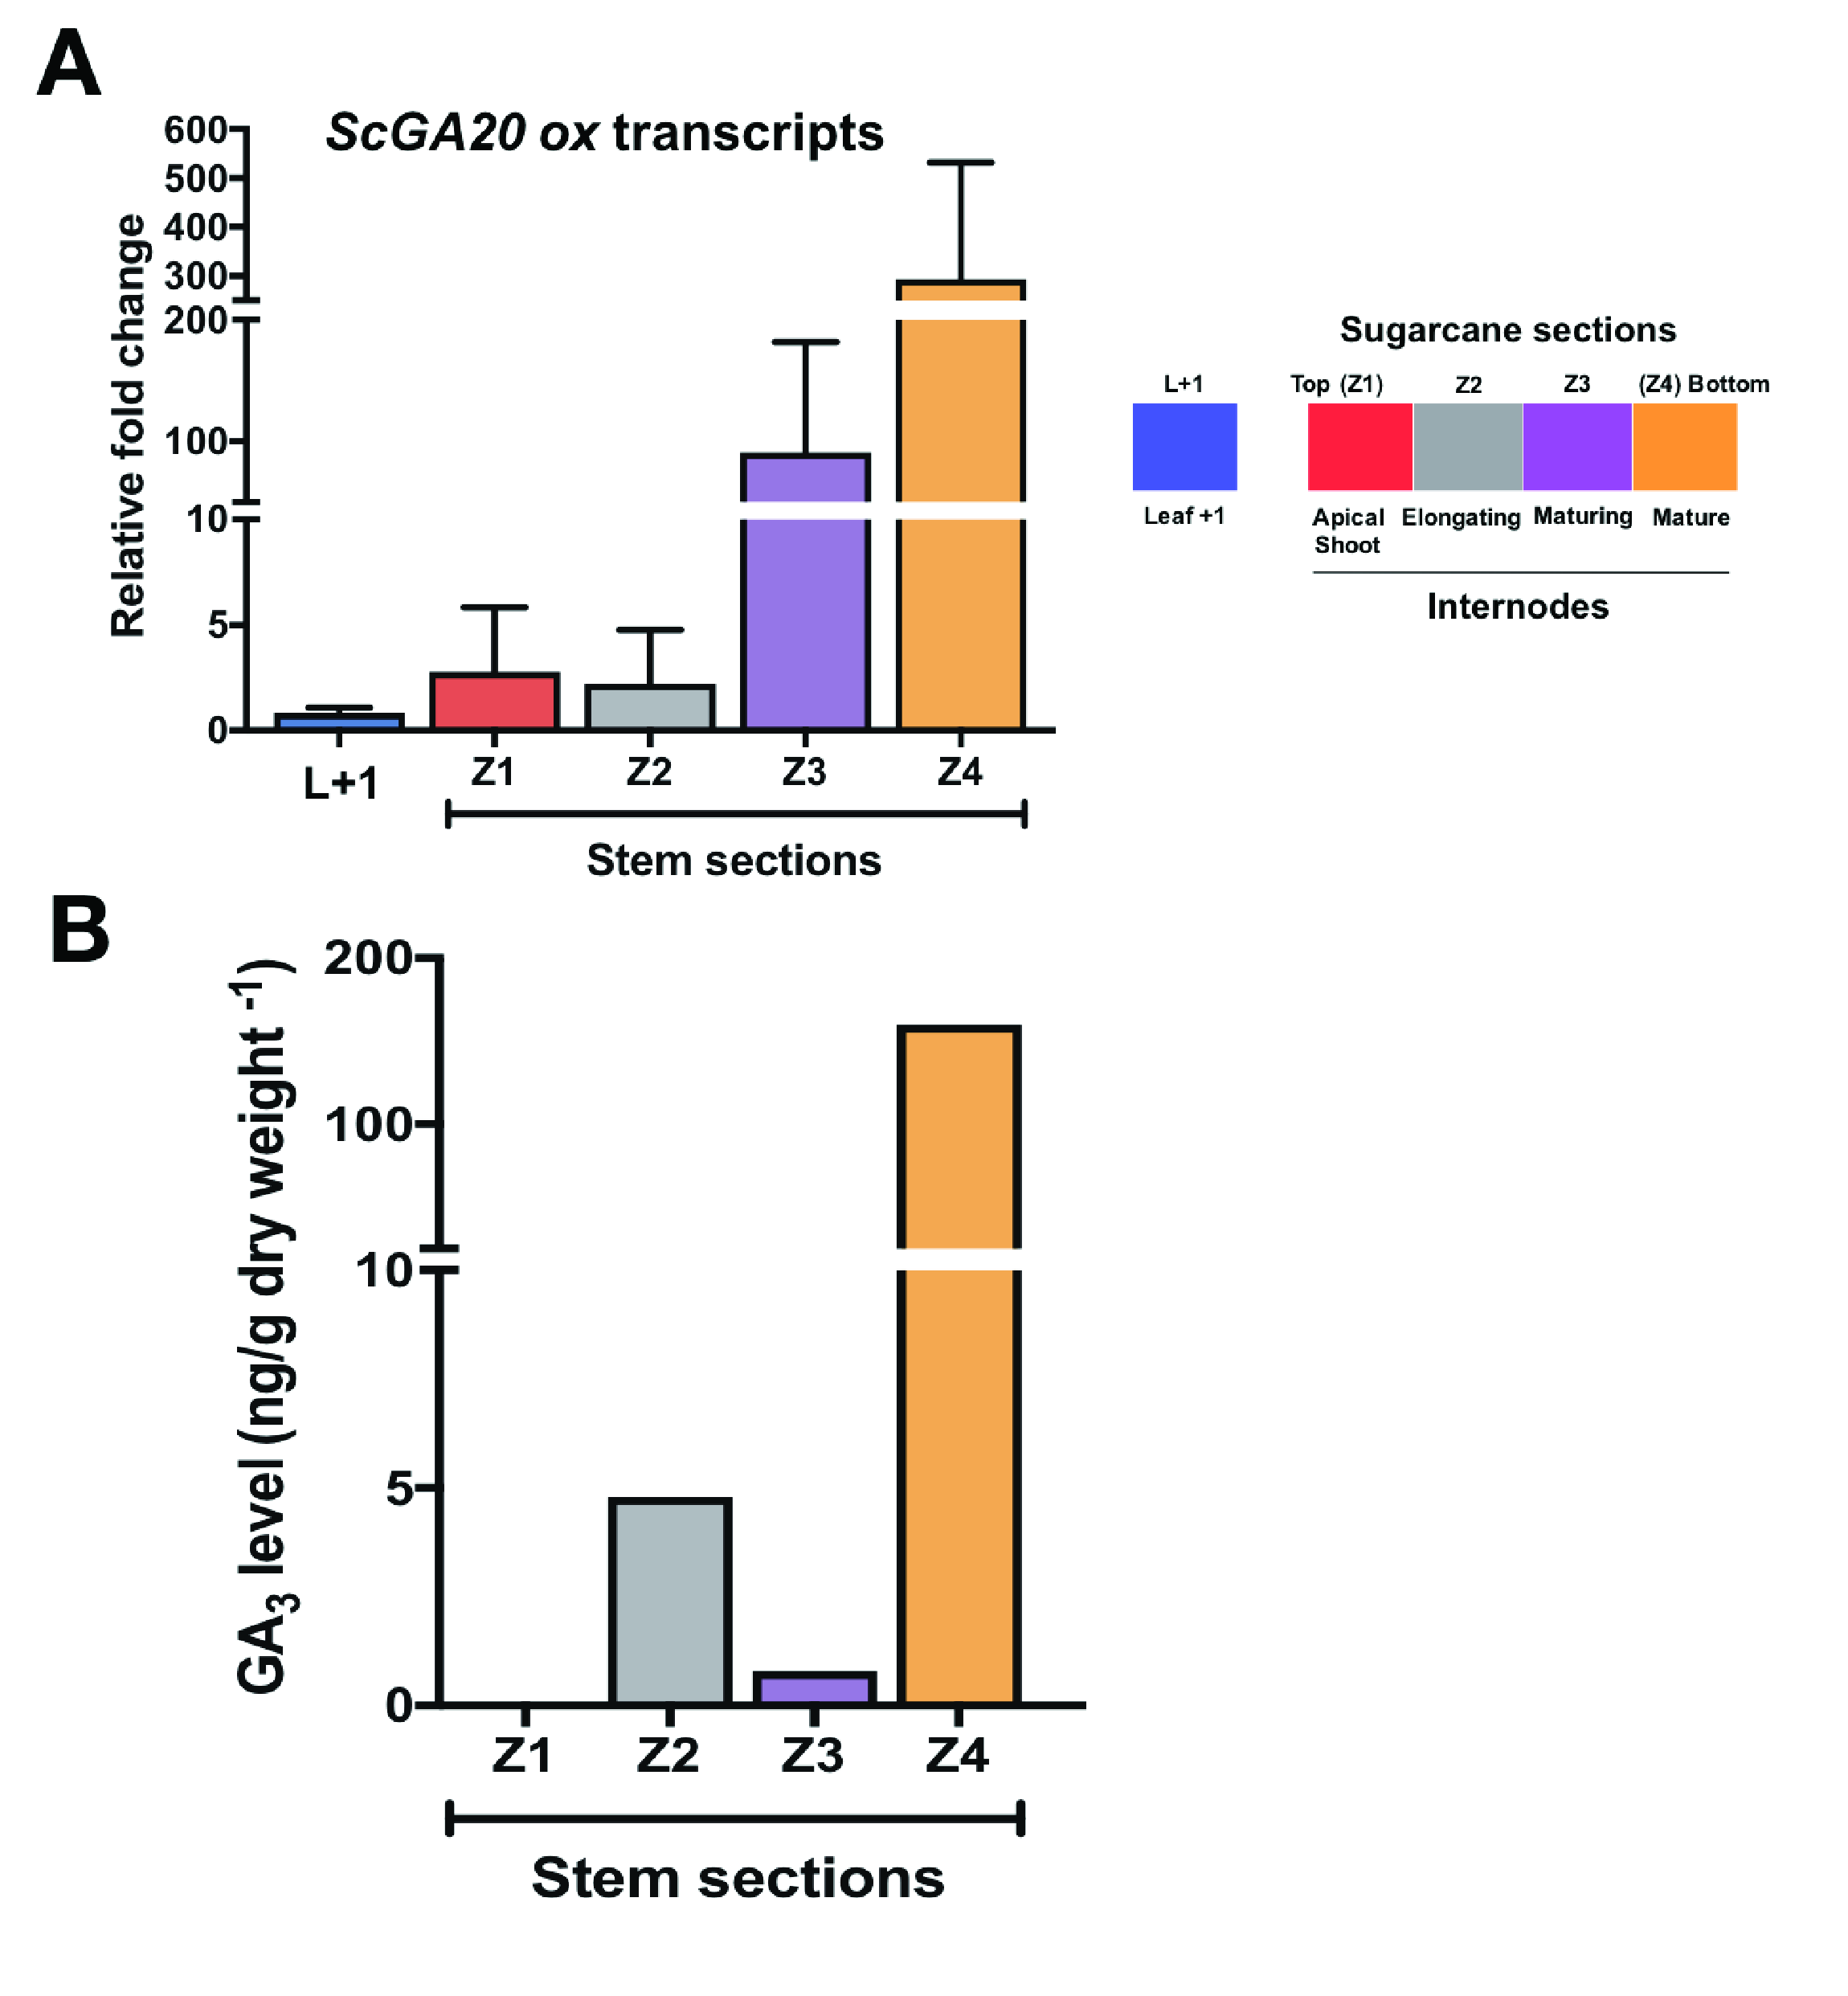


Fig. S2. GA hormone is synthesized in the basal internodes in sugarcane.

A. Expression profile of the native *ScGA20* oxidasegenein different tissues of 10-month-old sugarcane; Bar plots show means ±SD of five biological replicates. B. GA3 hormone level in sugarcane tissues. Neither GA1 nor GA4 were detected in the analyzed samples. Each samples correspond to a pool from five biological replicates.


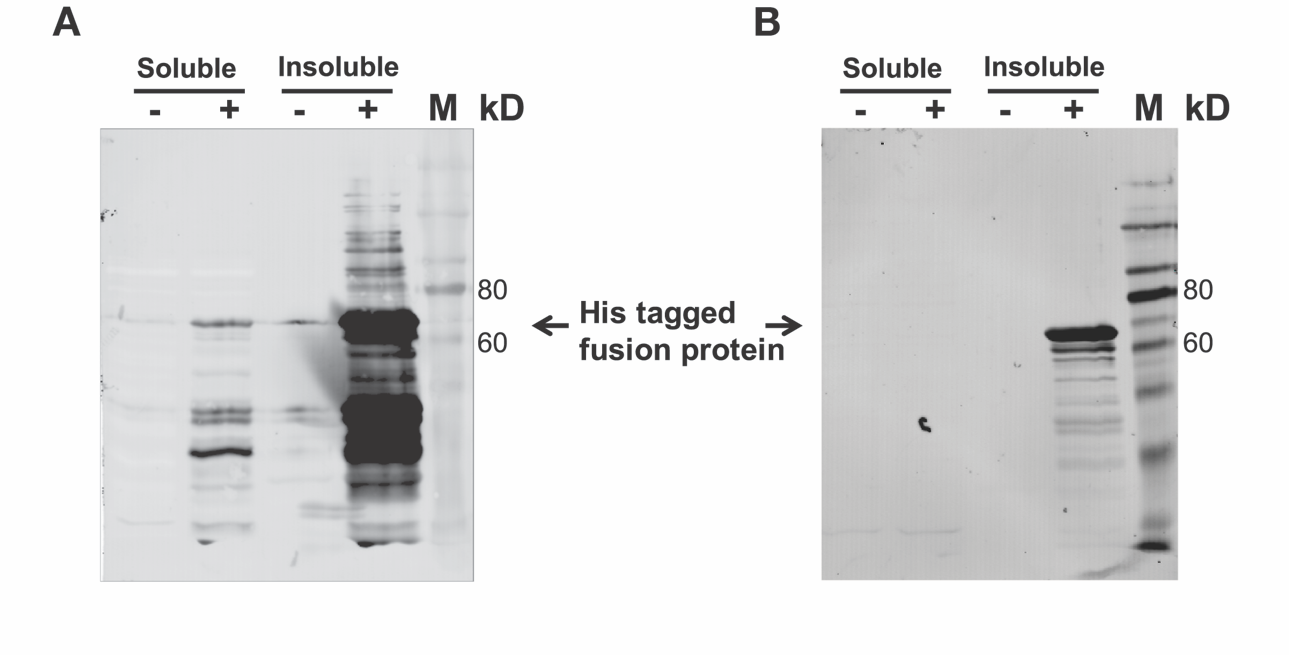


Fig. S3. Expression of His-tagged ScGAI protein conferred its molecular weight of 66 kDa in *Escherichia coli* (*E.coli*).

Expression of recombinant ScGAI protein was induced in *E. coli*. Total protein was extracted and assessed by immunoblotting using the **A.** anti-ScGAI (1:1000 dilution) and **B.** the anti-His (1:1000 dilution) antibodies; lane 1 and 3, non-induced extracts, and lane 2 and 4, induced extracts. Lane 5, Molecular weight marker; Recombinant proteins are indicated with arrows.


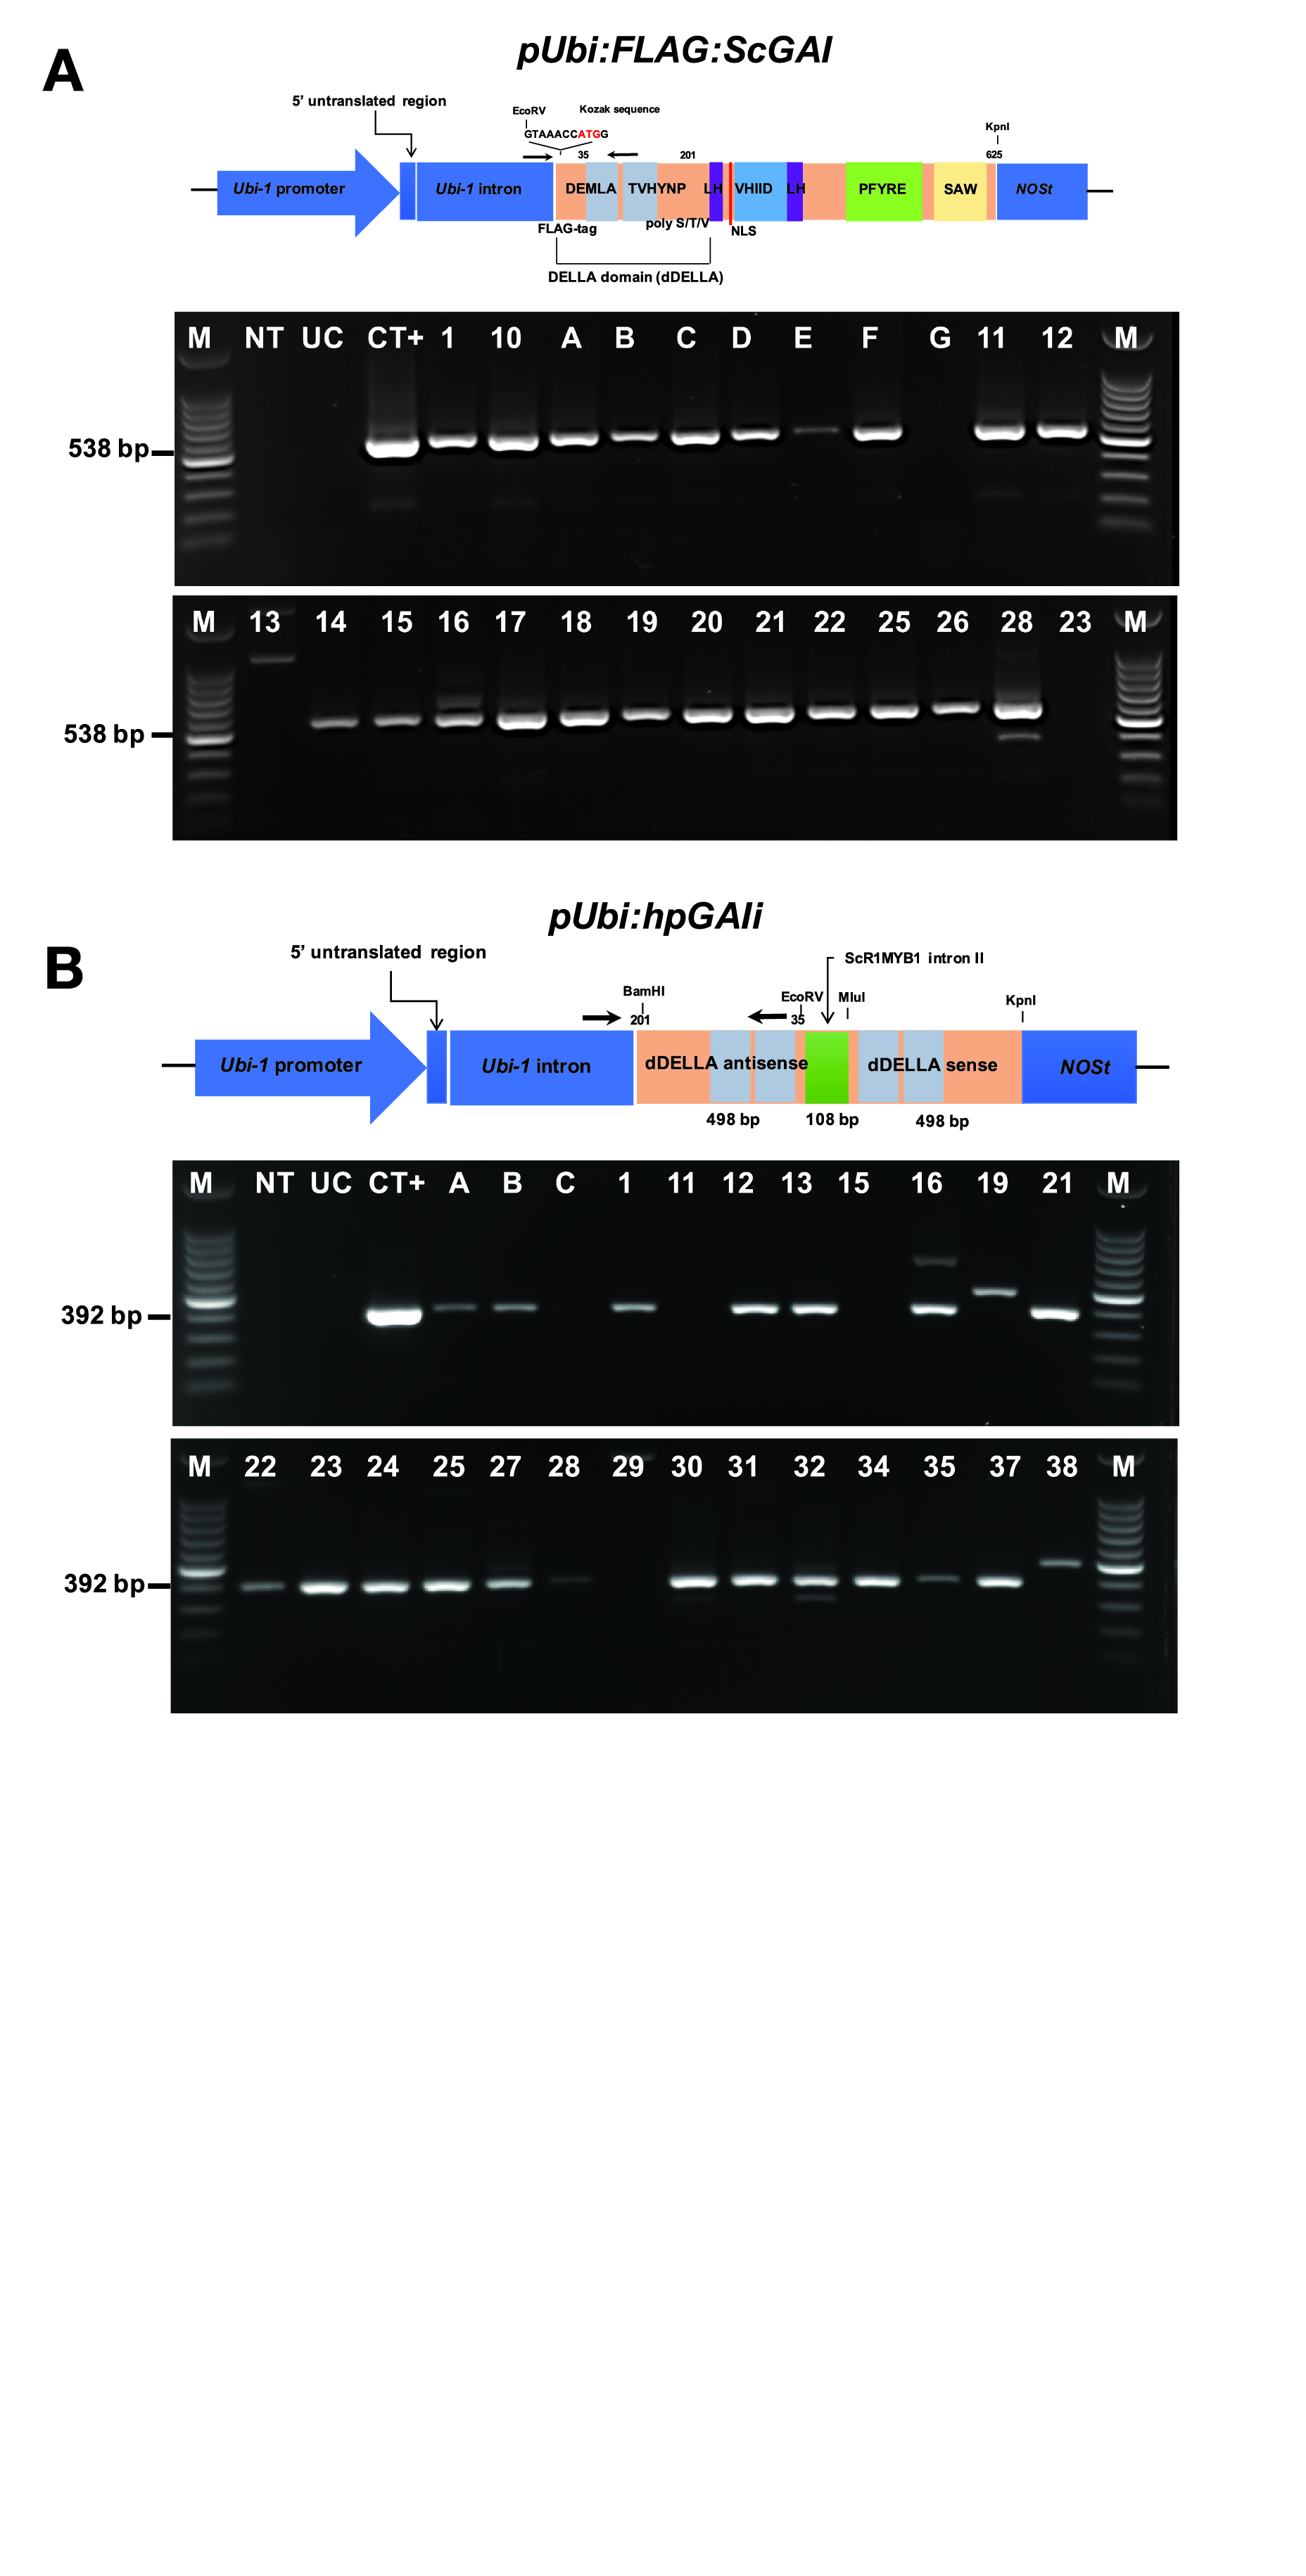


Fig. S4. Transgene constructs and PCR genotyping for identification of putative transgenic lines.

**A.** Overexpression cassette pUbi:FLAG:ScGAI and the positive transgenic lines identified with the expected PCR band. **B.** Hairpin-mediated silencing cassette pUbi:hpGAIiand the positive lines confirmed by the expected PCR band. M: 100 bp ladder (Promega); NT: non-template; UC: untransformed control; CT+: positive control (vectors); Numbers and letters correspond to the putative transformed lines; The set of primers used is shown as arrows in each construct diagram.


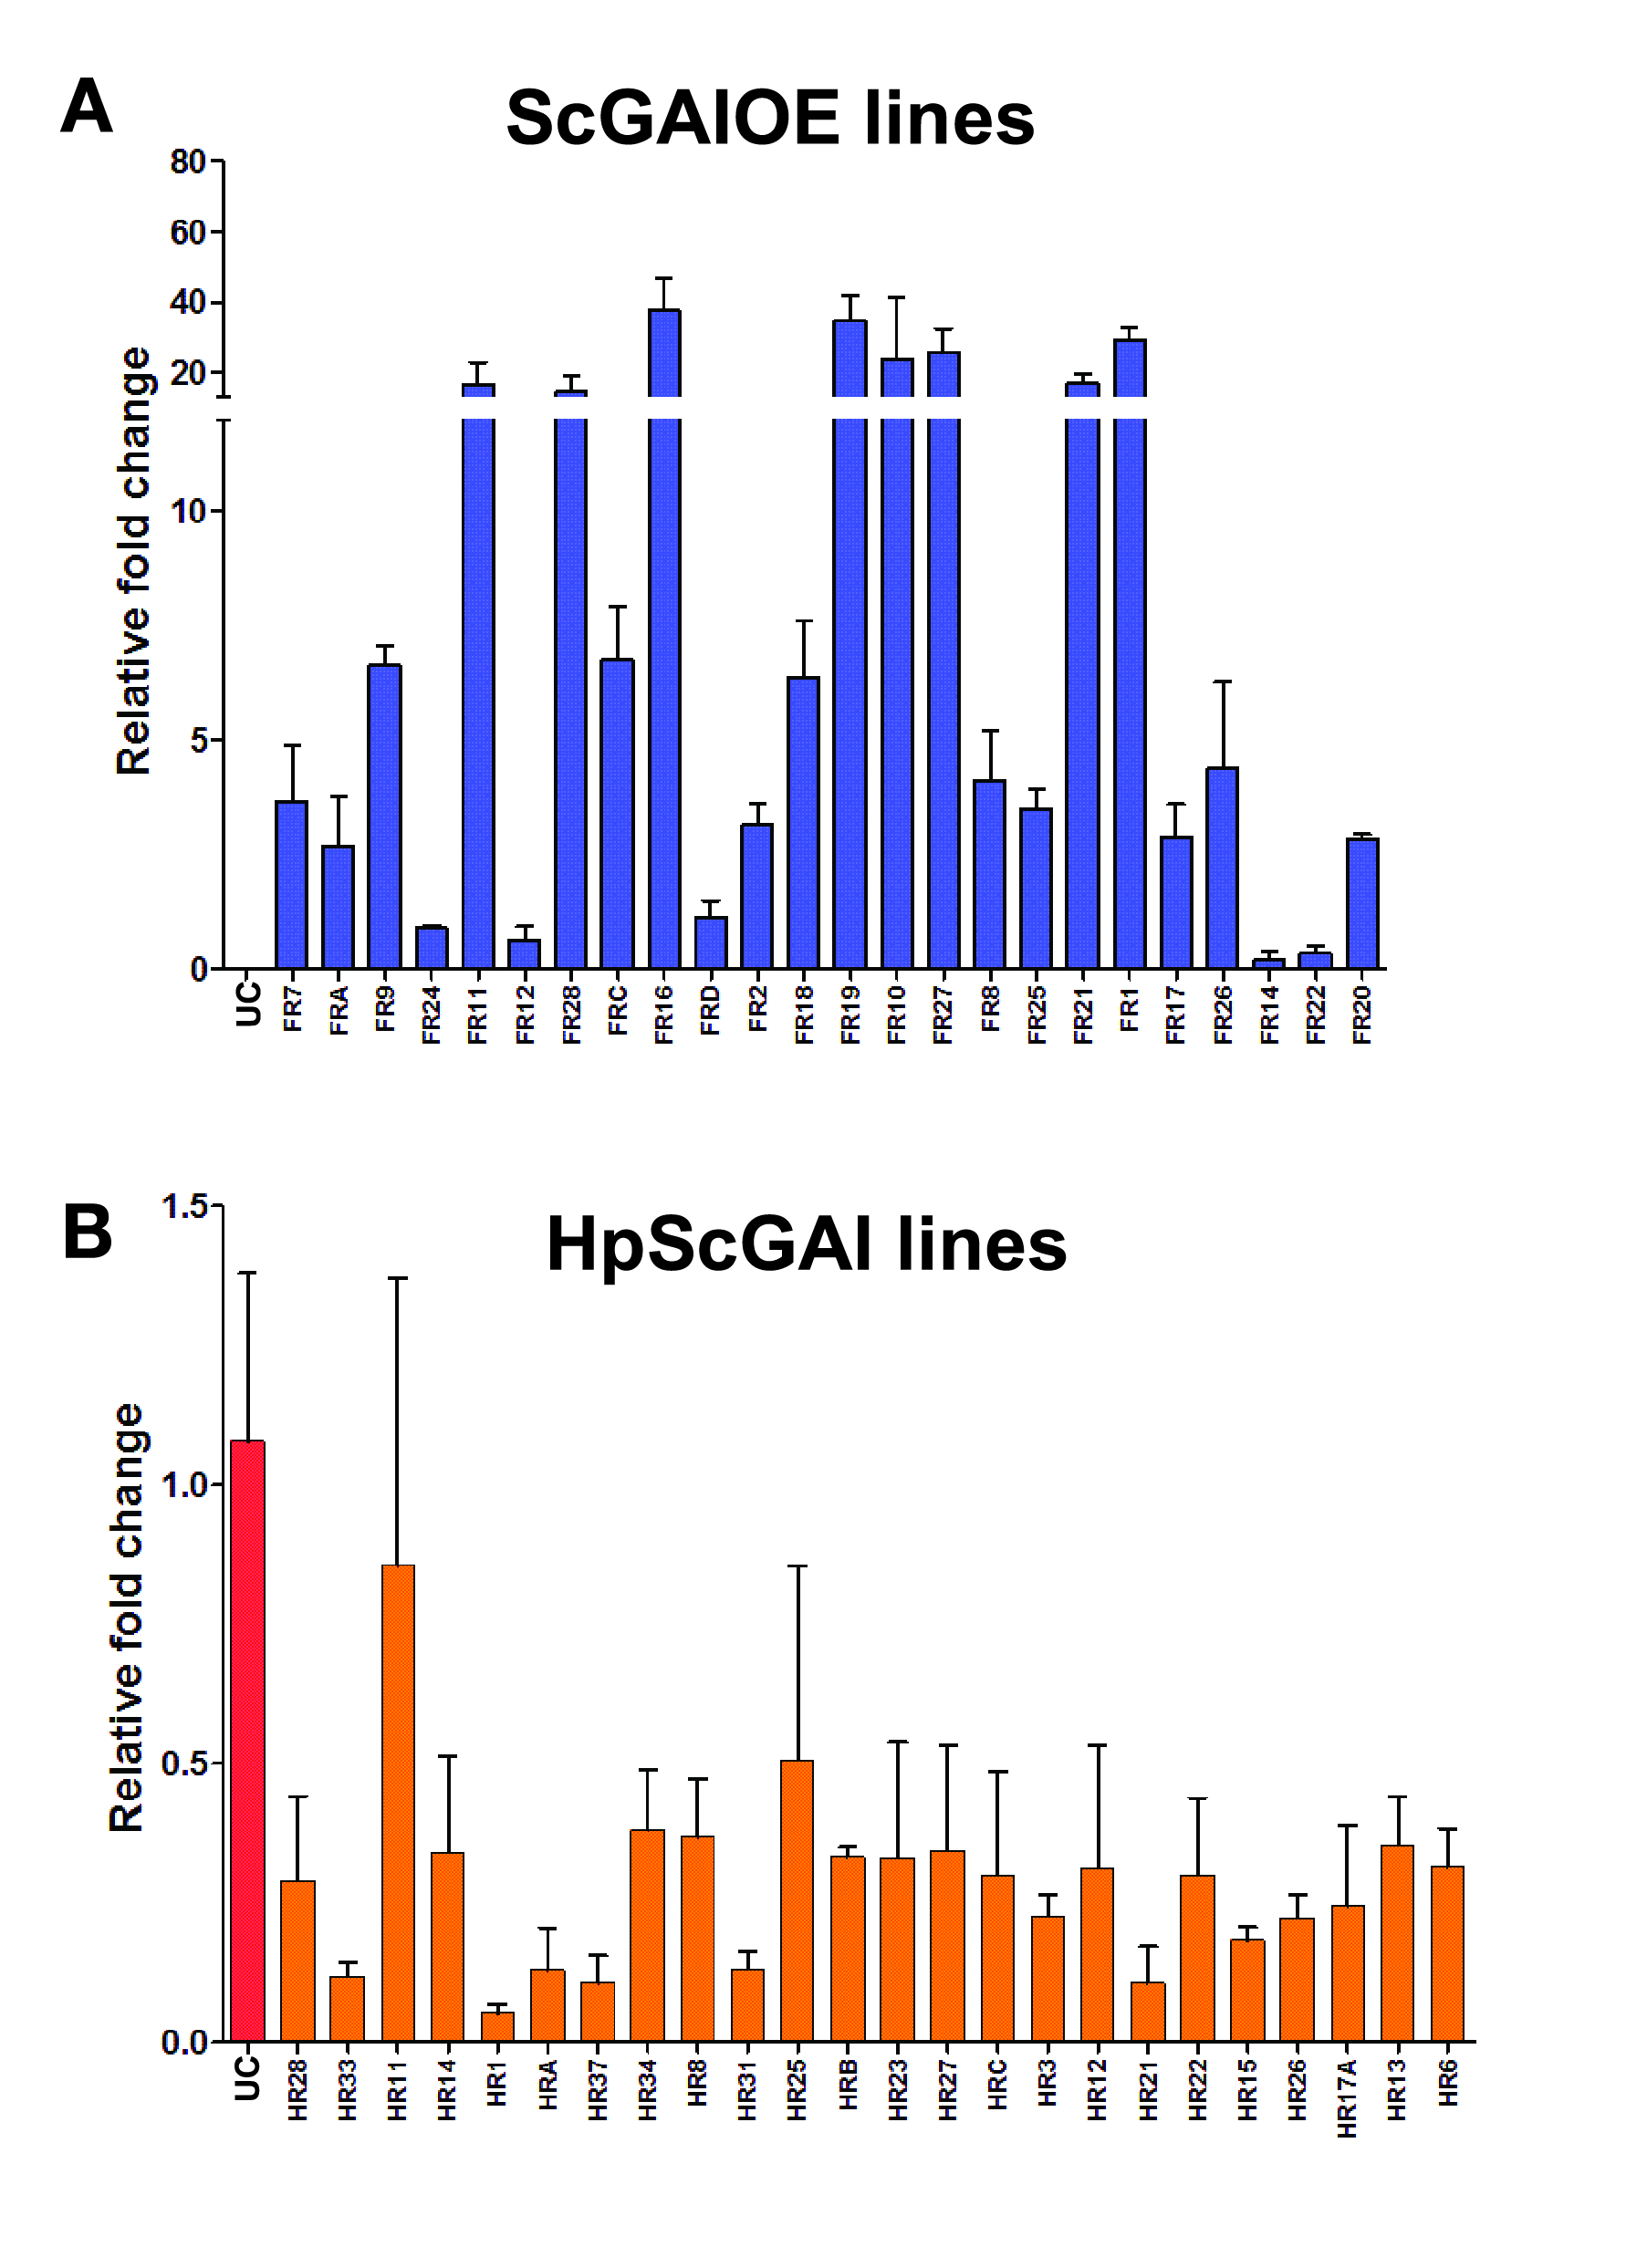


Fig. S5.  *ScGAI* gene expression in the ScGAIOE and HpScGAI transgenic sugarcane lines.

**A.** Expression level of the *FLAG:ScGAI* transgene. **B.** Expression level of endogenous *ScGAI* in untransformed control (UC) and hairpin-mediated DELLA silencing lines. Data represent the mean ±SD of three independent biological replicates.


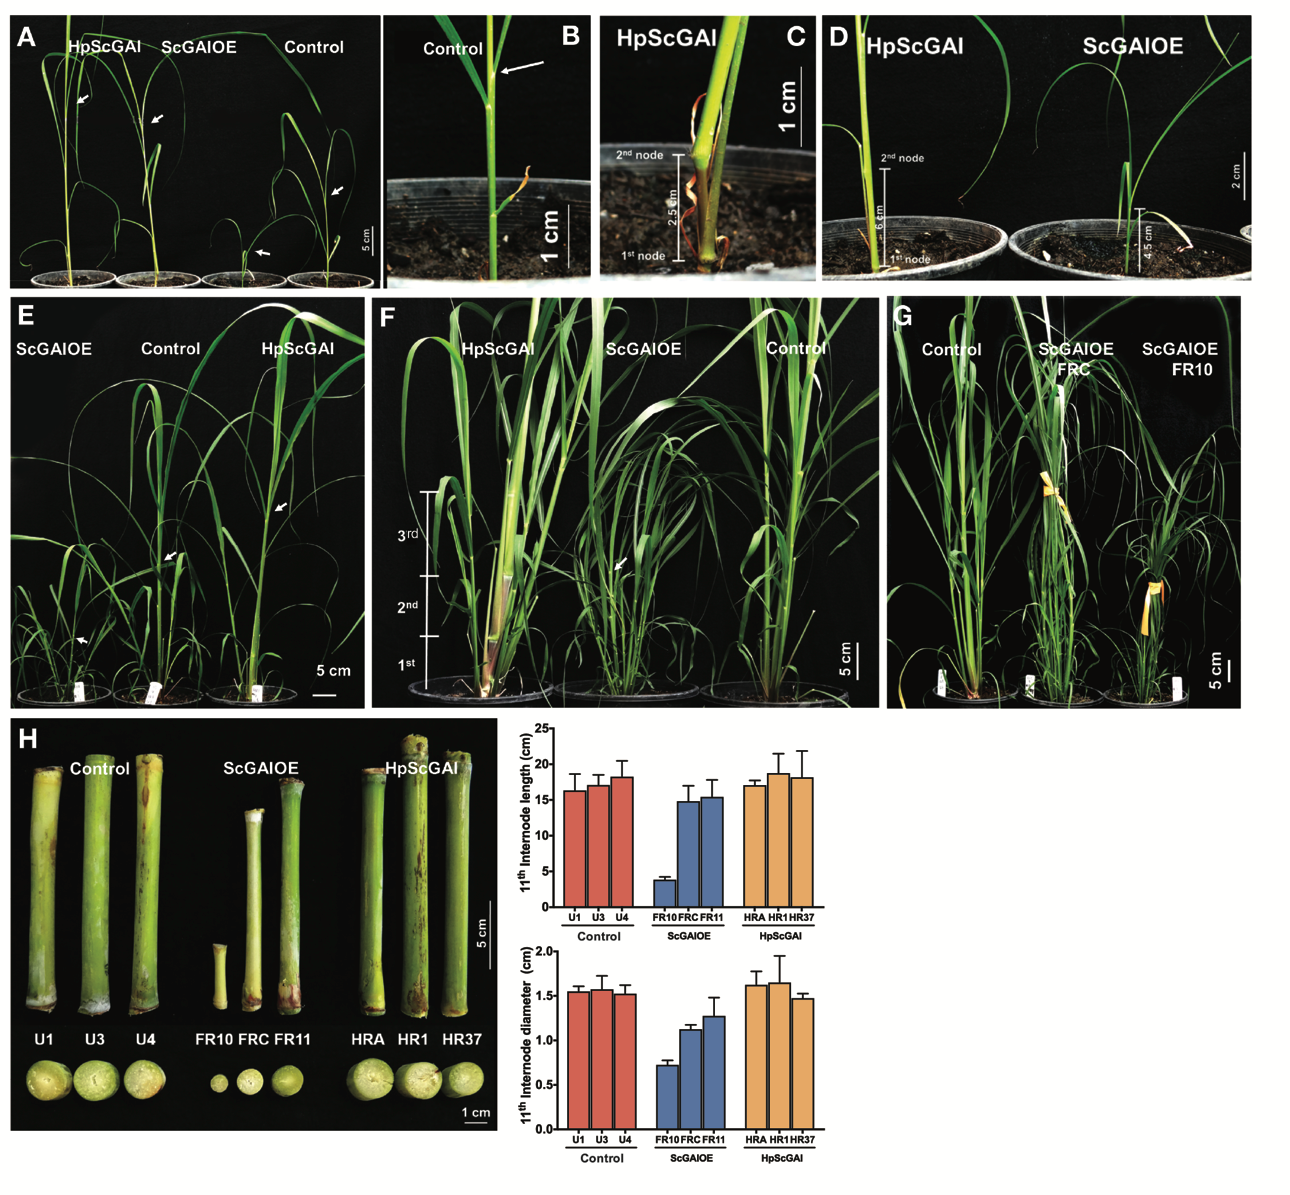


Fig. S6. Gross phenotype of ScGAIOE and HpScGAI transgenic sugarcane plants.

1-month-old in **A** and close-up in (**B, C** and **D**) showing the earliest onset of internodes in HpGAI lines; **E.** 2-month-old; **F.** and **G** 3-month-old showing the high tiller numbers. Arrows indicate the first visible dewlap; **H.** 11th internode length and diameter measurement of 6-month-old plants. Bar plots show means ±SD of four biological replicates. U1, U3 and U4: untransformed controls; FR10, FRC and FR11: ScGAIOE plants; HRA, HR1 and HR37: HpScGAI plants.


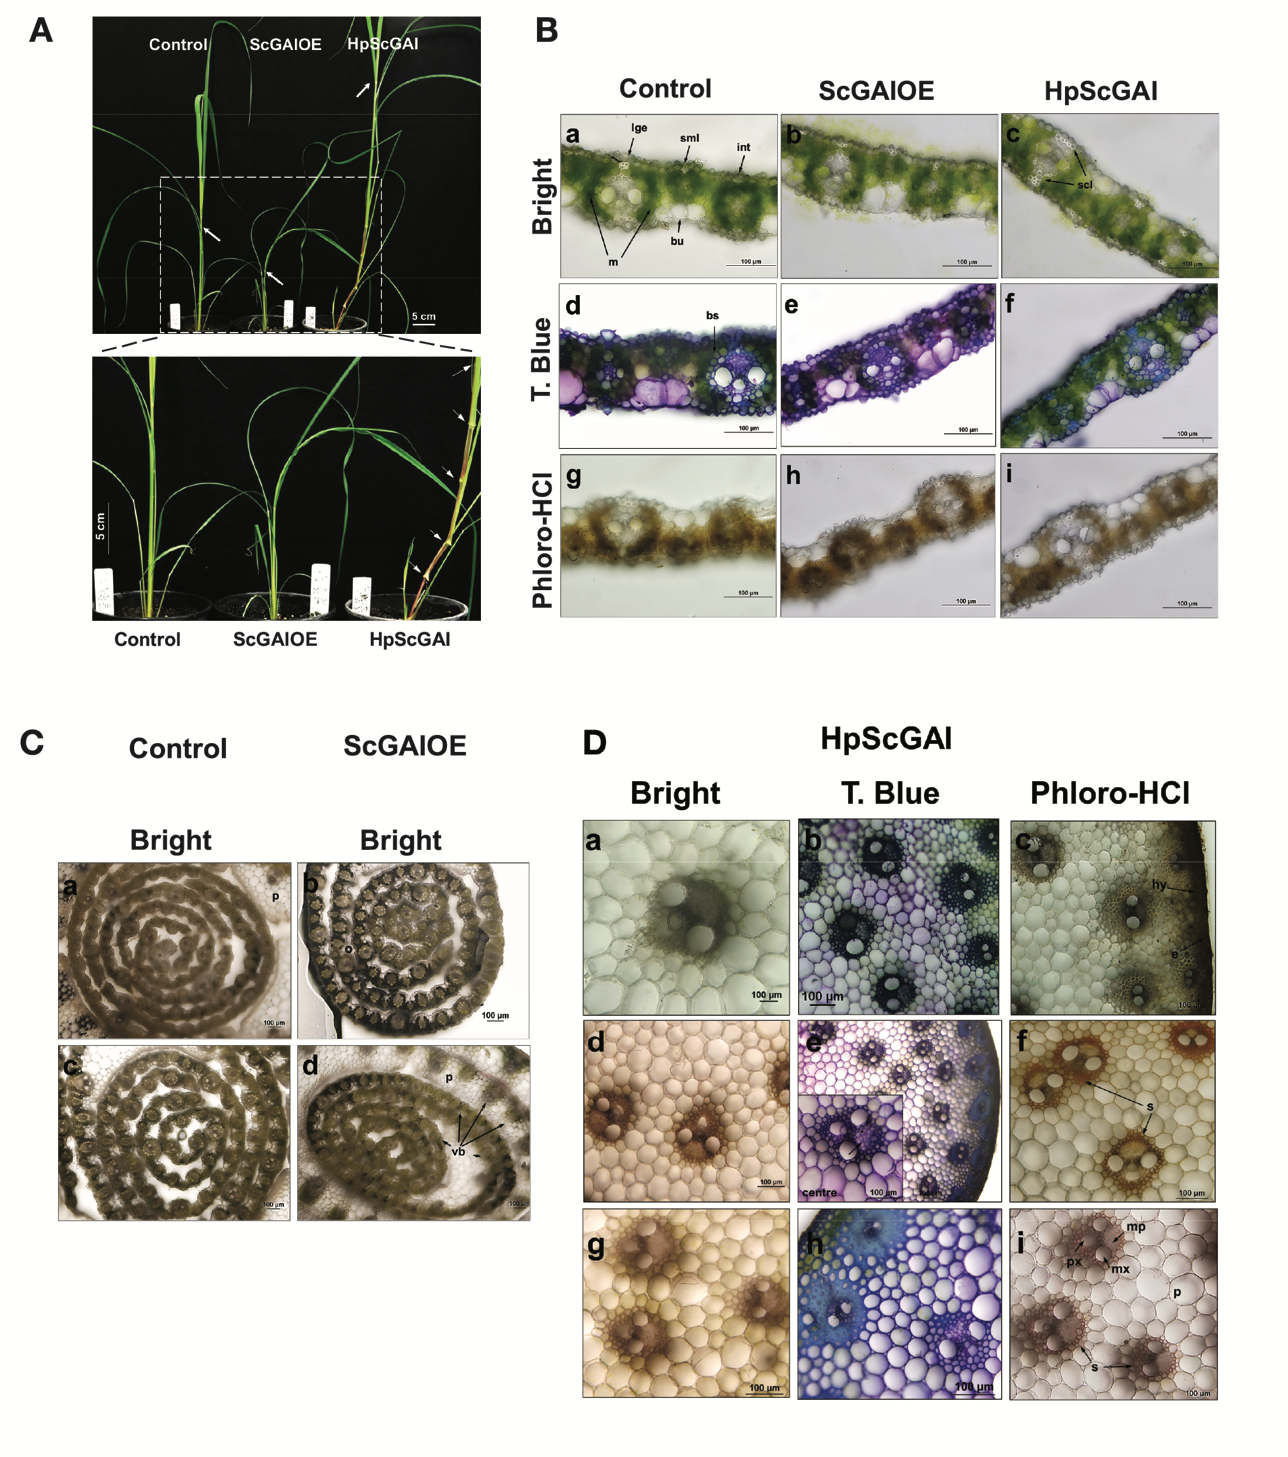


Fig. S7. Leaf and stem histology of control, ScGAIOE and HpScGAI transgenic sugarcane plants.

**A.** 3-month-old plants. Close-up view displaying the stunted growth in ScGAIOE and the presence of internodes in HpScGAI plants. Arrows indicate the first visible dewlap; **B.** Cross section of leaves in bright-field light **a**,**b** and **c**, and stained with toluidine blue (T.blue) **d**, **e** and **f** or phloroglucinol-HCl (Phloro-HCl) **g**, **h** and **i**. Large (lge), small (sml) and intermediate (int) vascular bundle, scl – sclerenchyma, bu – buliform cells, bs – bundle sheath, m- mesophyll cell; **C.** Cross-section of the leaf roll from control in bright-field in **a** and **c**, and from ScGAIOE (FR10 line) in bright-field in **b** and **d**; **D.** Cross-section of the stem from HpScGAI plants (HR1 line) in bright-field light in **a**, **d** and **g**, toluidine blue (T.blue) stained in **b**, **e** and **h**, and phloroglucinol-HCl (Phloro-HCl) stained in **c**, **f** and **i**. Parenchyma cells (p), vascular bundles (vb), metaxylem (mx), protoxylem (px), metaphloem (mp), epidermis (e), sclerenchyma (ex), hypodermis (hy).


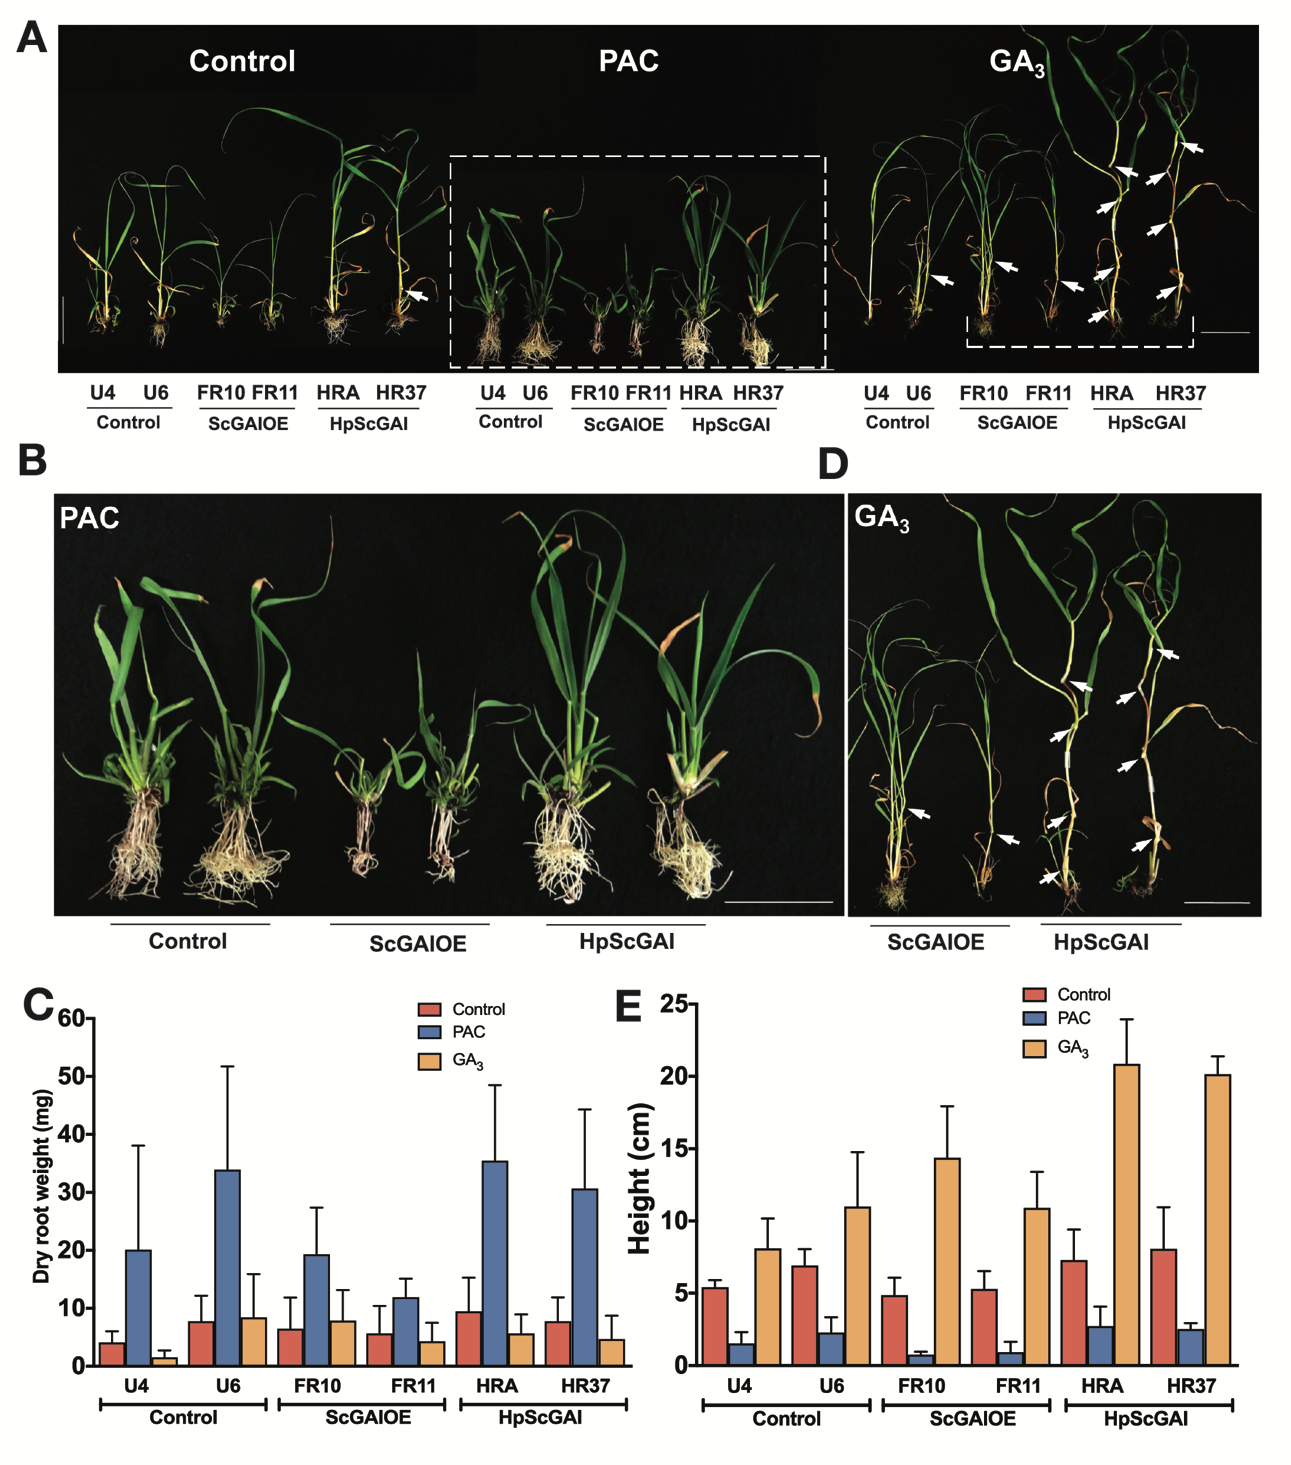


Fig. S8. Transgenic sugarcane plants showed stronger responses to gibberellin (GA3)and paclobutrazol (PAC) than control plants.

**A.** Morphology of sugarcane plants after 23 days of treatment with GA3 **(**50µM) and PAC (5 µM). Arrows indicate the nodes. Scale bars = 5 cm. **B.** Close-up view of PAC-treated seedlings. Scale bars = 5 cm. **C.** Dry root weight of control, ScGAIOE and HpScGAI plants. **D.** Close-up view of GA3-treated transgenic plants. Arrows indicate the nodes;Scale bars = 5 cm. **E.** Height of control, ScGAIOE and HpScGAI transgenic lines. Error bars indicate the SD of the mean of four biological replicates.

**
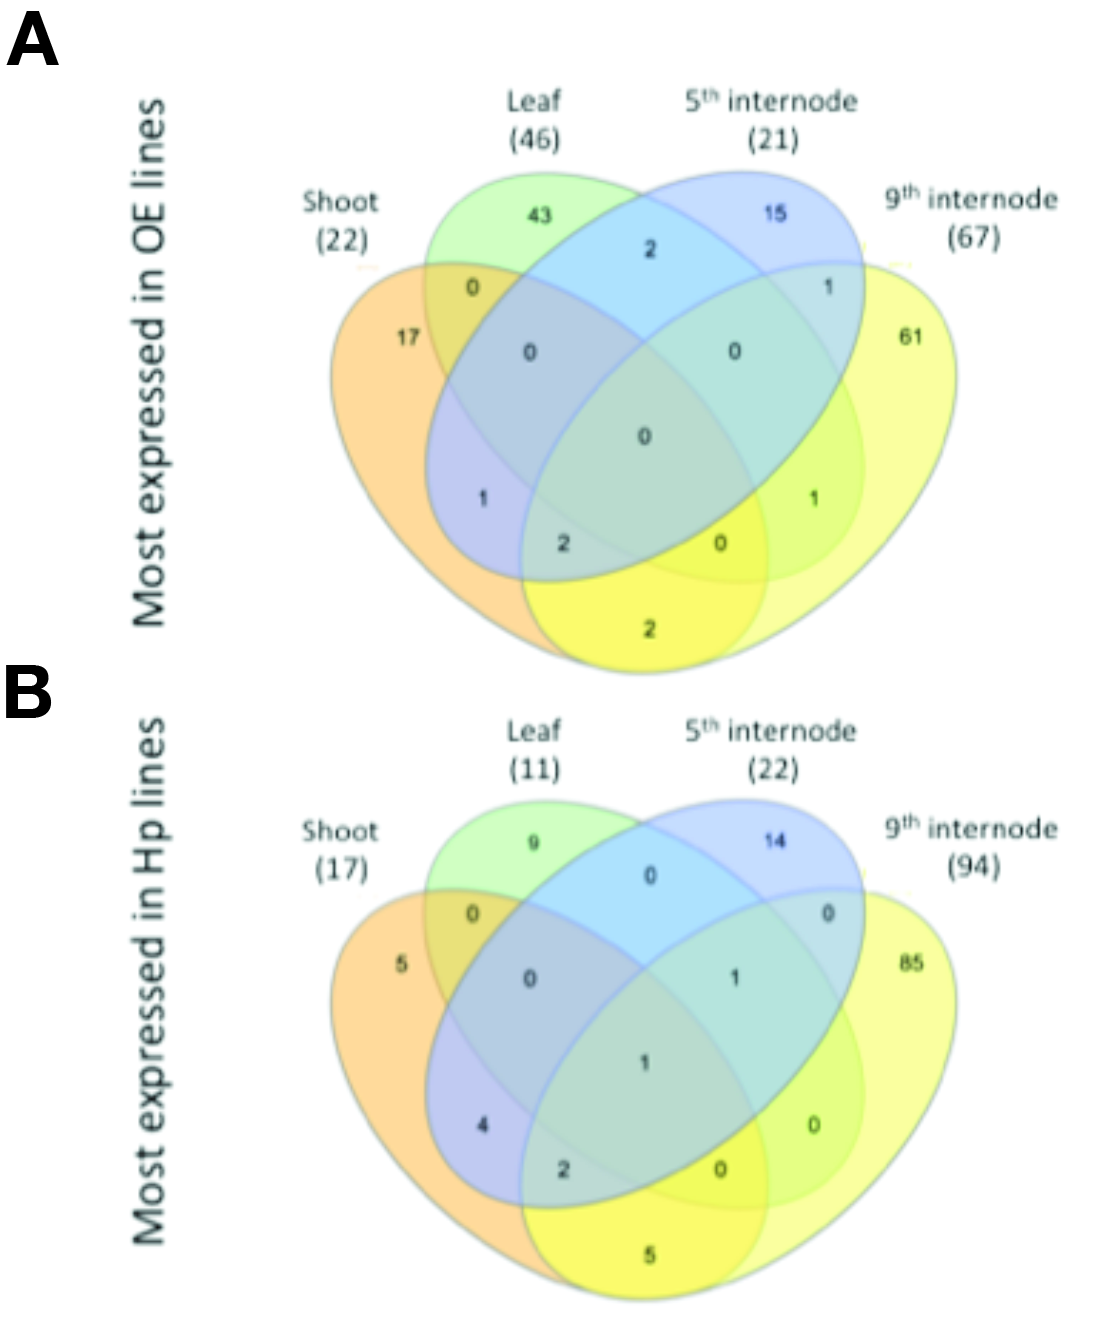
**

Fig. S9. Transcriptional responses of ScGAIOE and HpScGAI plants.

Venn diagram showing the differentially expression genes (DEGs) (number in parentheses) **A.** in ScGAIOE and **B.** in HpScGAI tissues.


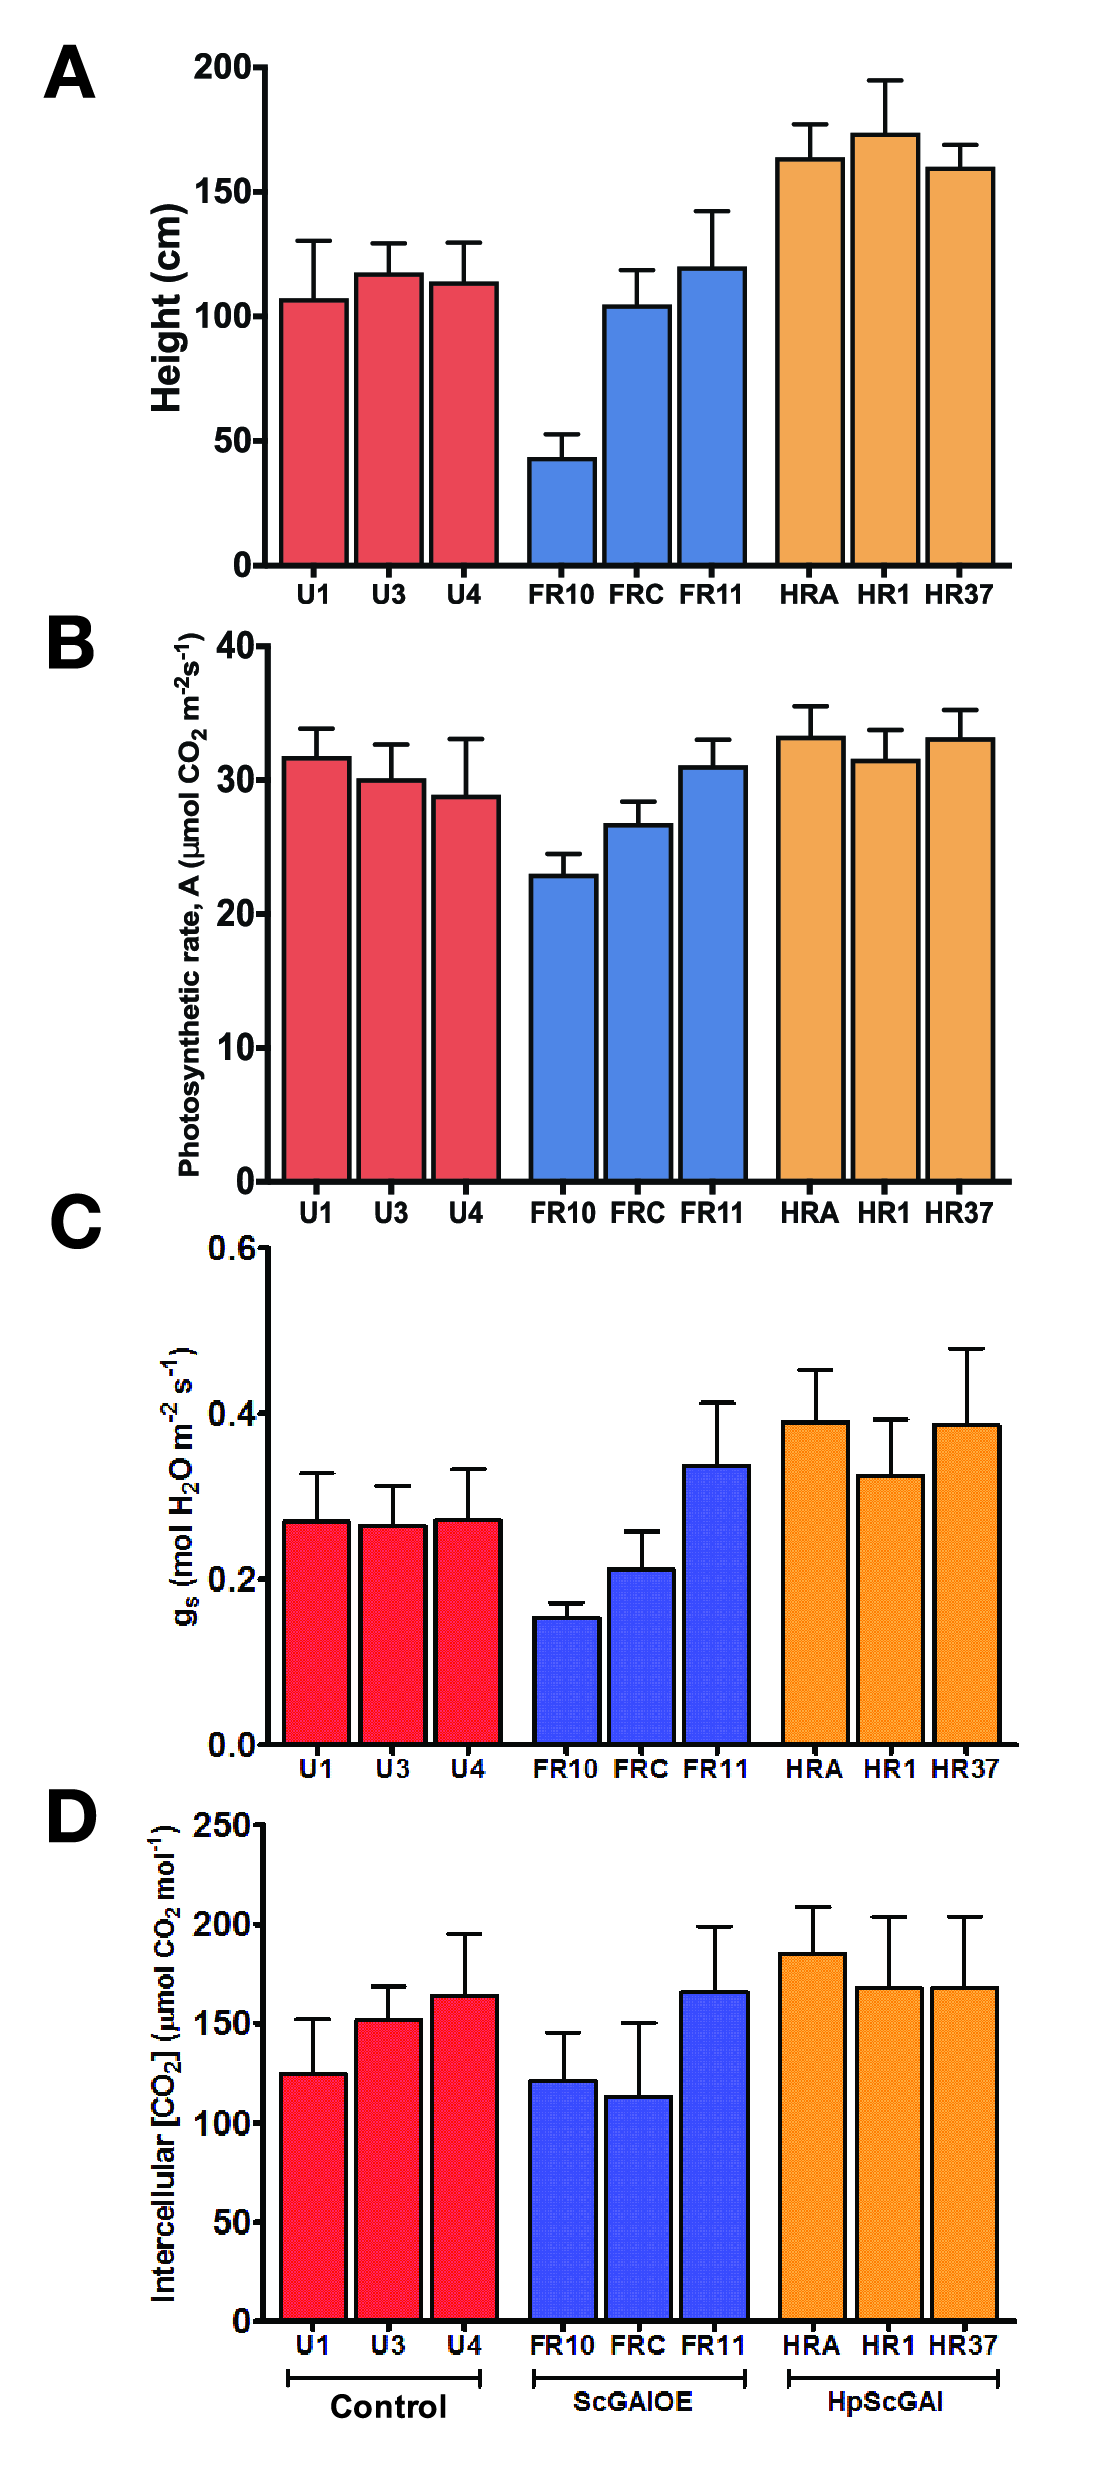


Fig. S10. Photosynthesis in the ScGAIOE and HpScGAI transgenic sugarcane.

**A.** Height, **B.** Photosynthesis rate A., **C.** Stomatal conductance (*gs*) and **D.** Intercellular [CO2], (*ci*). Parameters were measured in 5-month-old plants. Bar plots show means ±SD of seven biological replicates.


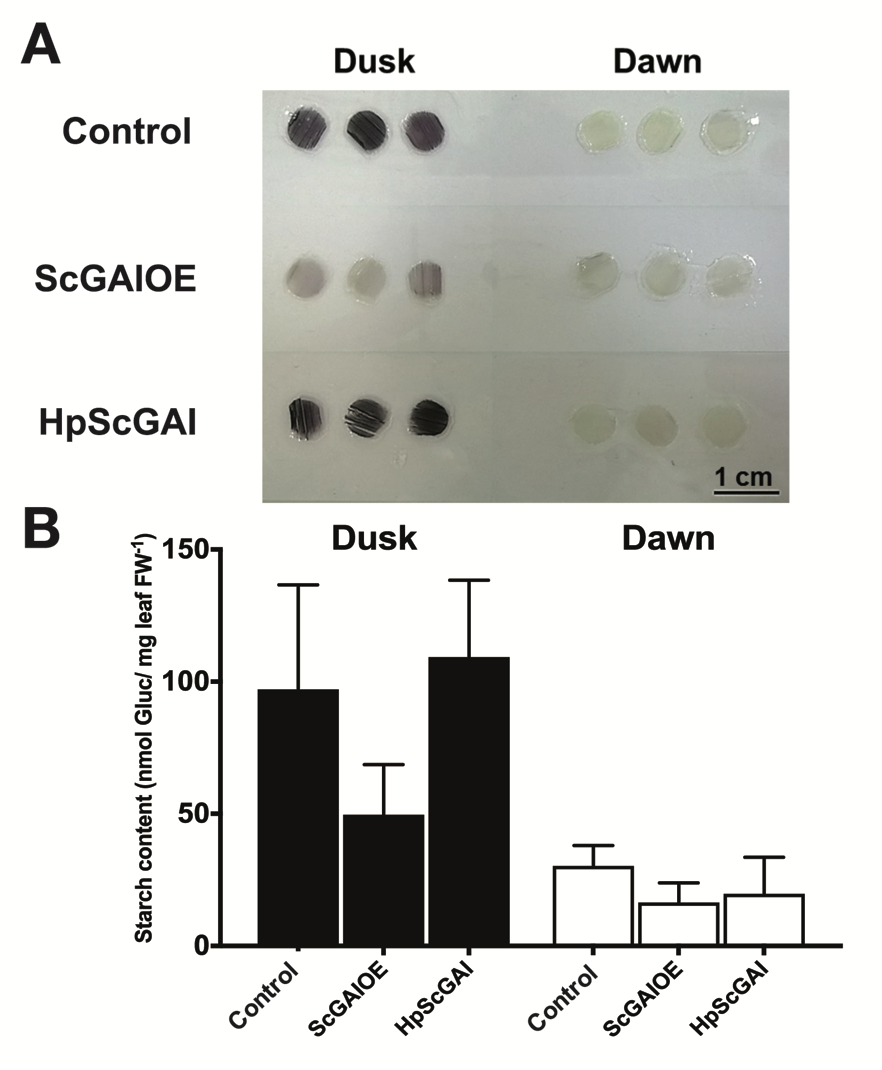


**Fig. S11.** **ScGAIOE shows impaired starch accumulation during the day.**

Starch turnover was evaluated in diurnal cycle by **A.** Lugol’s iodine solution in leaf+1 discs of three independent biological replicates and confirmed by **B.** enzymatic starch assay of five independent biological replicates.


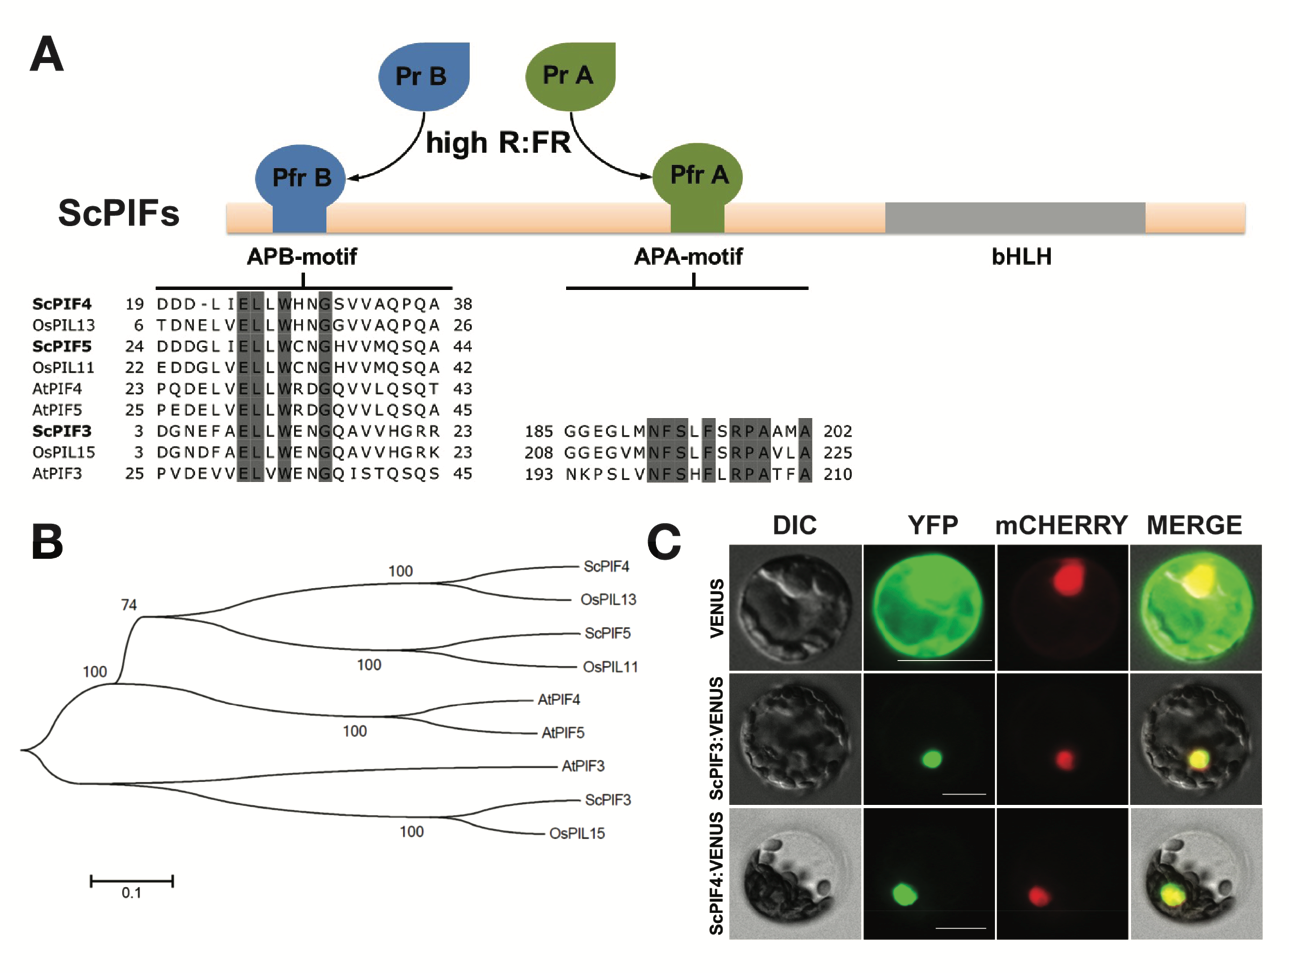


Fig. S12. Phytochrome-Interacting Factors (PIFs) 3 and 4 are nuclear basic helix-loop-helix (bHLH) proteins in sugarcane.

**A.** Schematic representation of PIF proteins showing their conserved domains along the sequence. APB and APA-motifs mediate the binding to phyB Pfr and phyA Pfr, respectively; **B.** Phylogenetic tree of PIF proteins. **C.** Subcellular localization of ScPIF:VENUS fusion proteins in Arabidopsis mesophyll protoplast. The construct *AtPARP3:mCHERRY* (mCHERRY) was used as nuclear control. DIC: Differential Interference Contrast; YFP: Yellow Fluorescent protein. Bars = 20 µM


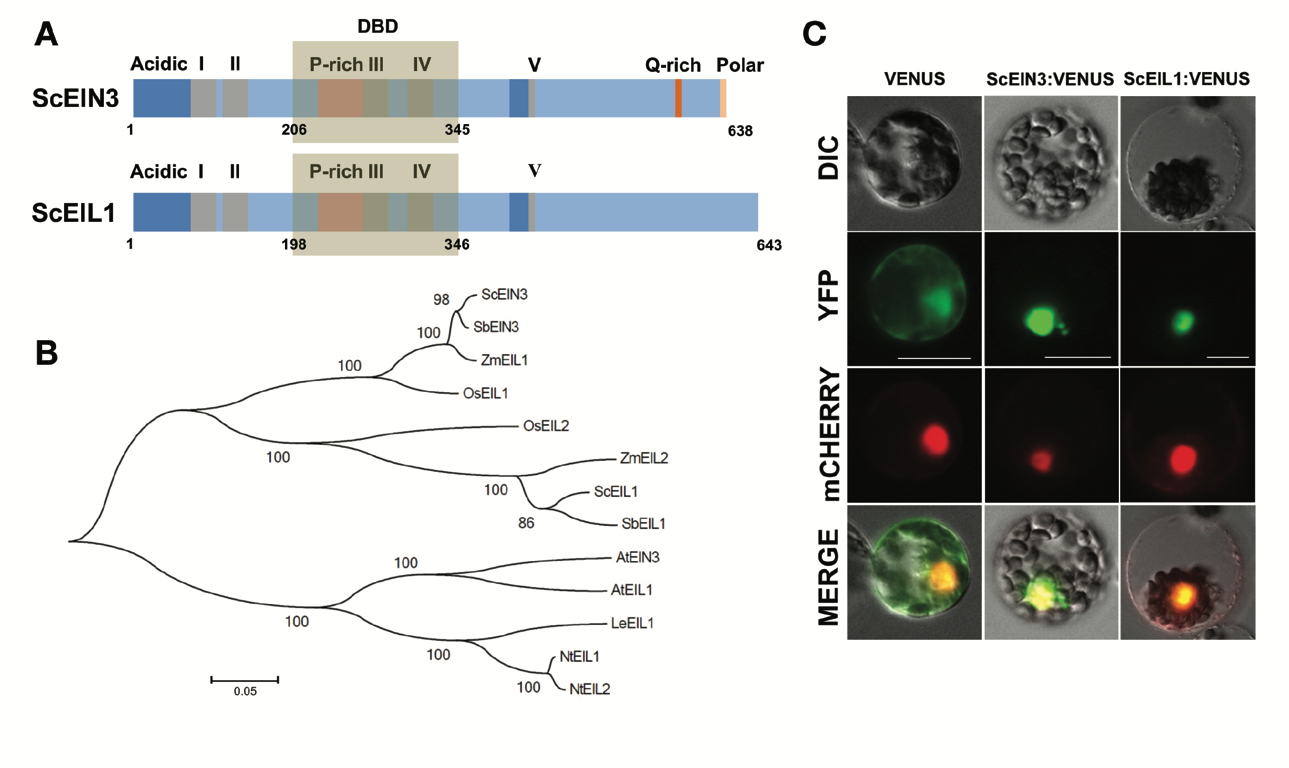


Fig. S13. ScEIN3 and ScEIL1, the master transcription factors of ethylene signaling.

**A.** Schematic representation of ScEIN3/EIL1 proteins showing their conserved domains along the sequences. DBD means DNA binding domain. P-rich means proline rich and Q-rich means glutamine rich domains. The numbers are indicating the five basic domains; **B.** Phylogenetic tree of ScEIN3/EIL1 proteins. **C.** Subcellular localization of ScEIN3/EIL1 proteins in Arabidopsis mesophyll protoplast. The construct *AtPARP3:mCHERRY* (mCHERRY) was used as nuclear control. DIC means Differential Interference Contrast. YFP means Yellow Fluorescent protein. Bars = 20 µM

**Table S1.** Composite list of DEGs in leaves between ScGAIOE and HpScGAI.

| **GeneID** | **Annotation** | **ScGAIOE** | **HpScGAI** | **Fold change (Log2)** | **q-values** |
| --- | --- | --- | --- | --- | --- |
| Sb01g007360 | Gibberellic acid -stimulated Arabidopsis (GASA8) gene | 3.63978 | 0 | inf | 0.018663 |
| Sb01g029310 | Expansin B2 – (EXPB2) | 1.82334 | 0 | inf | 0.018663 |
| Sb01g036580 | Euonymus lectin S3 - EULS3 | 125.358 | 12.1324 | -3.36912 | 0.018663 |
| Sb01g042690 | Sugar transporter family protein – (STP13) | 43.3993 | 7.30469 | -2.57078 | 0.032348 |
| Sb01g043720 | Glycosyl hydrolase family 10 protein | 0.990486 | 0 | inf | 0.018663 |
| Sb01g044580 | Alcohol dehydrogenase GroES-like | 68.0263 | 11.0143 | -2.62672 | 0.04479 |
| Sb01g007590 | UDP-glucuronosyl/UDP-glucosyltransferase | 0 | 3.645 | inf | 0.032348 |
| Sb01g010660 | DELLA | 39.7408 | 4.80204 | -3.0489 | 0.018663 |
| Sb01g020150 | KAT2 – 3- Ketoacyl-Coa thiolase 2 | 252.081 | 23.083 | -3.44899 | 0.018663 |
| Sb01g033820 | Transducin/WD40 repeat-like superfamily protein | 57.6083 | 7.64138 | -2.91437 | 0.018663 |
| Sb01g042270 | Cytochrome P450 74A – (CYP74A) | 360.304 | 52.1615 | -2.78816 | 0.032348 |
| - | NI | 3.43827 | 0 | inf | 0.018663 |
| Sb10g029300 | Thylakoid lumenal 16.5 kDa protein | 23.6458 | 123.636 | 2.38644 | 0.04479 |
| Sb10g028360 | GDSL-like Lipase/Acylhydrolase | 15.4885 | 82.5155 | 2.41347 | 0.04479 |
| Sb02g037570 | Glucose transmembrane transporter - Polyol transporter 5-like | 18.154 | 1.98172 | -3.19546 | 0.032348 |
| Sb02g037650 | Scarecrow-like 5 | 216.577 | 18.8808 | -3.51989 | 0.018663 |
| Sb02g003010 | Early-responsive to dehydration – (ERD4) | 182.848 | 5.04105 | -5.18078 | 0.018663 |
| Sb02g007870 | Metal transporter Nramp6 – (NRAMP1) | 1.79574 | 0 | inf | 0.018663 |
| Sb02g010810 | Aquaporin-like – (PIP2B) | 0 | 2.58132 | inf | 0.018663 |
| Sb02g026360 | Galactosyltransferase | 33.9953 | 2.60119 | -3.70809 | 0.018663 |
| Sb02g031550 | Copper amine oxidase | 0 | 2.81452 | inf | 0.018663 |
| Sb02g036750 | Polygalacturonase inhibitor 1 – (PGIP2) | 2.29455 | 0 | inf | 0.018663 |
| - | NI | 0 | 51.842 | inf | 0.018663 |
| Sb03g000850 | Putative bark storage protein | 104.951 | 17.2066 | -2.60868 | 0.018663 |
| Sb03g029790 | CTP synthase – (emb2742) | 40.2019 | 5.45801 | -2.88082 | 0.018663 |
| Sb03g007380 | Mannose-6-phosphate isomerase – (PMI1) | 9.95695 | 56.4115 | 2.50221 | 0.018663 |
| Sb03g023990 | Early-responsive to dehydration – (ERD) | 76.1976 | 11.114 | -2.77737 | 0.018663 |
| Sb03g030330 | MYB family transcription factor – (RL6) | 0 | 46.0747 | inf | 0.018663 |
| Sb03g040490 | C2H2 zinc finger protein – (WIP4) | 0.803423 | 0 | inf | 0.018663 |
| Sb03g042450 | Lipoxygenase – (LOX1) | 318.627 | 28.708 | -3.47234 | 0.018663 |
| Sb03g044980 | Glutathione S-transferase – (GSTF13) | 109.402 | 21.297 | -2.36092 | 0.018663 |
| Sb03g046090 | BHLH039 | 3.72414 | 0 | inf | 0.018663 |
| Sb04g000620 | Vacuolar invertase 2 – (VAC-INV 2) | 83.5824 | 14.485 | -2.52864 | 0.032348 |

“NI” means no identified; “inf” indicates no ratio.

**Table S1**. Continuation.

| **GeneID** | **Annotation** | **ScGAIOE** | **HpScGAI** | **Fold change (Log2)** | **q-values** |
| --- | --- | --- | --- | --- | --- |
| Sb04g000830 | HPL1 (Hydroperoxide Lyase 1) (CYP74B2) | 36.3315 | 3.85201 | -3.23754 | 0.018663 |
| Sb04g021410 | Early-responsive to dehydration – (ERD1) | 92.2606 | 14.9928 | -2.62145 | 0.018663 |
| Sb04g024090 | NPF8.3. NRT1/ PTR family 8.3 - Peptide transporter (PTR2) | 118.224 | 13.927 | -3.08557 | 0.018663 |
| Sb04g024440 | Glycerophosphoryl diester phosphodiesterase – (GPDL2) | 27.8855 | 3.19227 | -3.12686 | 0.018663 |
| Sb04g033350 | Cytochrome b5-like Heme/Steroid binding domain -CB5-E | 8.58836 | 0 | inf | 0.018663 |
| Sb04g025550 | APK1 - Serine-threonine/tyrosine-protein kinase | 246.684 | 28.4504 | -3.11615 | 0.018663 |
| Sb04g026690 | Uncharacterized protein | 4.67203 | 0 | inf | 0.018663 |
| Sb04g031040 | Jumonji transcription factor/ zinc finger (C5HC2 type) | 23.0275 | 1.20107 | -4.26097 | 0.018663 |
| - | NI | 0 | 20.0573 | inf | 0.018663 |
| - | NI | 48.5983 | 319.451 | 2.71662 | 0.018663 |
| Sb05g003860 | LTP1 – Lipid transfer protein 1 | 4.46598 | 0 | inf | 0.018663 |
| - | NI | 0 | 4.64044 | inf | 0.018663 |
| - | NI | 0 | 3.87019 | inf | 0.018663 |
| Sb06g021790 | Wall-associated receptor kinase-like 20 precursor-  (CRCK3) | 74.8249 | 14.0611 | -2.41181 | 0.04479 |
| Sb06g028200 | Protease inhibitor/seed storage/LTP family | 243.106 | 34.7061 | -2.80832 | 0.018663 |
| Sb06g000660 | Heat shock protein – (HSP90.1) | 9.17577 | 60.5537 | 2.72231 | 0.018663 |
| Sb06g003280 | HIPP27 - Heavy metal associated isoprenylated plant protein 27 | 112.18 | 8.56149 | -3.71181 | 0.018663 |
| Sb06g022460 | Beta-glucosidase 45 – (BGLU45) | 15.1642 | 77.432 | 2.35226 | 0.032348 |
| Sb06g027770 | ACA8 (auto-inhibited CA2+ -ATPASE. isoform 8) | 19.1969 | 2.89684 | -2.72832 | 0.04479 |
| Sb06g032460 | PAO4. Polyamine Oxidase 4 | 64.6633 | 10.8507 | -2.57516 | 0.018663 |
| Sb07g004700 | Chalcone synthase – (CHS) transparent testa 4. TT4 | 0 | 2.47114 | inf | 0.018663 |
| Sb07g005130 | Terpene synthase – (TPS21) | 183.727 | 21.3089 | -3.10804 | 0.018663 |
| Sb07g021950 | Receptor-like protein kinase precursor – (PEPR1) | 46.2865 | 3.24164 | -3.83579 | 0.018663 |
| Sb07g024030 | Oxidoreductase. 2OG-Fe(II) oxygenase family protein | 1.12088 | 0 | inf | 0.018663 |
| Sb08g023140 | AAA-ATPASE 1 | 36.0458 | 3.73987 | -3.26877 | 0.032348 |
| Sb08g023150 | AAA-ATPASE 1 | 46.4186 | 5.42508 | -3.09699 | 0.018663 |
| - | NI | 0 | 15.3463 | inf | 0.018663 |
| Sb09g001020 | PR (pathogenesis-related) -PR-6 proteinase inhibitor family | 2615.37 | 278.046 | -3.23362 | 0.018663 |
| Sb09g001050 | PR (pathogenesis-related) -PR-6 proteinase inhibitor family | 1802.67 | 189.723 | -3.24817 | 0.018663 |
| Sb09g003060 | Proteolipid membrane potential modulator – (RCI2A) | 499.02 | 47.4797 | -3.39371 | 0.018663 |
| Sb09g005800 | Histidine-containing phosphotransfer protein 4 – (AHP4) | 0 | 5.34066 | inf | 0.018663 |
| - | NI | 0 | 80.8544 | inf | 0.032348 |

“NI” means no identified; “inf” indicates no ratio.

**Table S2.** Composite list of DEGs in Apical shoot between ScGAIOE and HpScGAI.

| **GeneID** | **Annotation** | **ScGAIOE** | **HpScGAI** | **Fold change (Log2)** | **q-values** |
| --- | --- | --- | --- | --- | --- |
| Sb01g016810 | DYL1 (Dormancy-associated protein-like 1) | 109,977 | 33,15 | -1,73013 | 0,0264797 |
| Sb01g028256 | Tetratricopeptide repeat 10, TPR10 | 0 | 3,05063 | inf | 0,0264797 |
| Sb01g029610 | LTPL144 - Protease inhibitor/seed storage/LTP family protein precursor | 4,14948 | 0 | #NOME? | 0,0477927 |
| Sb01g036310 | HAD superfamily phosphatase | 135,969 | 26,6852 | -2,34917 | 0,0264797 |
| Sb01g045720 | sucrose transporter, SUC3 | 40,2308 | 10,813 | -1,89553 | 0,0264797 |
| Sb01g008350 | transmembrane BAX inhibitor motif-containing protein BIL4 | 43,0404 | 194,978 | 2,17955 | 0,0264797 |
| Sb01g014460 | VRN1 –Reduced vernalization response 1 | 2,80241 | 0 | #NOME? | 0,0264797 |
| - | NI | 0 | 18,0663 | inf | 0,0477927 |
| - | NI | 0 | 4,02684 | inf | 0,0477927 |
| Sb10g003890 | GDSL-like lipase/acylhydrolase | 143,286 | 42,2648 | -1,76137 | 0,0264797 |
| Sb10g012970 | Peptidyl-prolyl cis-trans isomerase FKBP65 – ROF2 | 50,2692 | 1091,04 | 4,43988 | 0,0264797 |
| Sb10g019360 | AQP1 –Delta tonoplast integral protein | 89,4797 | 6,54048 | -3,77409 | 0,0264797 |
| Sb10g026090 | Chloride transporter A – CLC-A | 16,1588 | 3,30871 | -2,28798 | 0,0264797 |
| Sb02g027900 | Photosystem I subunit G - PSAG | 250,123 | 91,8949 | -1,44458 | 0,0264797 |
| Sb02g032040 | Chlorophyll A-B binding protein LHB1B2,LHCB1.5 | 134,08 | 47,9085 | -1,48474 | 0,0264797 |
| Sb02g035600 | Beta-amylase 1 – RAM1 | 66,8796 | 223,019 | 1,73753 | 0,0264797 |
| Sb02g043260 | Euonymus lectin S3 - EULS3 | 148,289 | 43,8698 | -1,75711 | 0,0264797 |
| Sb03g005280 | FLA11 - Fasciclin-like arabinogalactan proteins | 242,591 | 86,7392 | -1,48377 | 0,0264797 |
| Sb03g006880 | HSP18.2 – Heat shock | 134,315 | 397,858 | 1,56663 | 0,0264797 |
| Sb03g041190 | NPF5.10 – Peptide transporter (PTR2) | 50,1346 | 15,1805 | -1,72359 | 0,0264797 |
| Sb03g006870 | HSP18.2 – Heat shock | 227,072 | 789,49 | 1,79777 | 0,0264797 |
| Sb03g042330 | MLP423- Pathogenesis-related Bet v I family protein | 3,32405 | 0 | #NOME? | 0,0264797 |
| Sb04g008670 | MYB-like HTH transcriptional regulator | 1,44684 | 0 | #NOME? | 0,0264797 |
| Sb04g009670 | BAG6 (BCL-2-associated athanogene 6) | 6,80622 | 27,3091 | 2,00446 | 0,0264797 |
| Sb04g009690 | BAG5 (BCL-2-associated athanogene 5) | 129,521 | 406,876 | 1,65141 | 0,0264797 |
| Sb04g001130 | CAT1 - Catalase isozyme A | 57,9455 | 14,5686 | -1,99184 | 0,0477927 |
| Sb04g026430 | RNA-binding (RRM/RBD/RNP motifs) family protein | 57,6438 | 183,417 | 1,66989 | 0,0264797 |
| Sb04g027330 | HSP20-like - Heat shock | 96,6096 | 669,184 | 2,79217 | 0,0264797 |
| Sb05g000440 | ASN1 - Asparagine synthetase – (DIN6) | 108,814 | 32,1247 | -1,76011 | 0,0264797 |
| Sb05g004100 | ASR1 - Abscisic stress-ripening 1 | 288,25 | 60,0521 | -2,26303 | 0,0264797 |
| Sb06g024780 | LTPL120 - Protease inhibitor/seed storage/LTP family protein | 0 | 8,15305 | inf | 0,0264797 |
| Sb06g024790 | LTPL120 - Protease inhibitor/seed storage/LTP family protein | 10,1617 | 485,377 | 5,57789 | 0,0264797 |
| Sb06g032310 | Leucine-rich repeat (LRR) family protein | 84,8772 | 27,8199 | -1,60926 | 0,0264797 |

“NI” means no identified; “inf” indicates no ratio.

**Table S2.** Continuation.

| **GeneID** | **Annotation** | **ScGAIOE** | **HpScGAI** | **Fold change (Log2)** | **q-values** |
| --- | --- | --- | --- | --- | --- |
| Sb06g033030 | PORA - Protochlorophyllide reductase A | 329,404 | 100,367 | -1,71457 | 0,0264797 |
| Sb06g000660 | HSP83 - Heat shock protein | 24,7329 | 521,226 | 4,39741 | 0,0264797 |
| Sb07g020270 | TPS9 - Trehalose-6-phosphatase synthase 9 | 15,7126 | 3,433 | -2,19438 | 0,0264797 |
| Sb09g023060 | PDC1 – Pyruvate decarboxylase 1 | 7,68714 | 39,1058 | 2,34686 | 0,0264797 |
| Sb09g019930 | PPDK - Pyruvate orthophosphate dikinase | 6,44379 | 25,8605 | 2,00477 | 0,0264797 |
| Sb09g022260 | Putative uncharacterized protein | 58,5064 | 8,82706 | -2,72859 | 0,0264797 |
| Sb09g025900 | HSP101 - Heat shock protein | 87,2806 | 457,537 | 2,39016 | 0,0264797 |
| Sb09g029500 | Pectin lyase-like superfamily protein | 26,2983 | 111,757 | 2,08733 | 0,0264797 |

“NI” means no identified; “inf” indicates no ratio.

**Table S3.** Composite list of DEGs in internode 5th between ScGAIOE and HpScGAI.

| **GeneID** | **Annotation** | **ScGAIOE** | **HpScGAI** | **Fold change (Log2)** | **q-values** |
| --- | --- | --- | --- | --- | --- |
| Sb01g009080 | GRF1-interacting factor 1 | 0 | 1,76847 | inf | 0,035812 |
| Sb01g020430 | Glycine-rich protein DOT1 | 110,538 | 449,668 | 2,02431 | 0,022577 |
| Sb01g036020 | CBL-interacting serine/threonine-protein kinase 10 – CIPK10 | 67,7524 | 15,3461 | -2,1424 | 0,022577 |
| Sb01g043630 | Dwarf 14 - D14 | 131,511 | 28,1199 | -2,22552 | 0,022577 |
| Sb01g047020 | Calmodulin-binding receptor-like cytoplasmic kinase 2 –CRCK2 | 29,0656 | 5,49055 | -2,40429 | 0,035812 |
| Sb01g047160 | RZFP34/CHYR1 | 113,677 | 27,805 | -2,03152 | 0,035812 |
| - | NI | 0 | 4,80613 | inf | 0,022577 |
| - | NI | 517,286 | 2730,2 | 2,39997 | 0,022577 |
| Sb10g012970 | Peptidyl-prolyl cis-trans isomerase FKBP65 – ROF2 | 42,3328 | 999,134 | 4,56083 | 0,022577 |
| Sb10g023670 | EIN3-binding F-box protein 1 – EBF1 | 132,585 | 30,6841 | -2,11135 | 0,022577 |
| Sb10g026090 | Chloride channel protein CLC-a | 37,4577 | 3,88015 | -3,27108 | 0,022577 |
| Sb02g033240 | xyloglucan endotransglucosylase/hydrolase protein 32 – XTH32 | 30,1725 | 107,884 | 1,83818 | 0,035812 |
| Sb02g003010 | Early-responsive to dehydration 4 - ERD4 | 90,6823 | 20,9488 | -2,11396 | 0,022577 |
| Sb02g031550 | Copper amine oxidase family protein | 0 | 4,77988 | inf | 0,022577 |
| - | NI | 0 | 53,1402 | inf | 0,022577 |
| Sb03g042860 | AKS2- ABA-responsive kinase substrate 2 | 73,8751 | 13,9807 | -2,40166 | 0,022577 |
| Sb03g002020 | NA+/CA2+ Exchanger | 268,712 | 75,106 | -1,83906 | 0,035812 |
| Sb03g039530 | Laccase-17 – LAC17 | 31,3293 | 3,59022 | -3,12537 | 0,022577 |
| Sb04g009670 | BAG family molecular chaperone regulator 6 – BAG6 | 8,12306 | 31,1694 | 1,94004 | 0,035812 |
| Sb04g017450 | Inositol-tetrakisphosphate 1-kinase 1 – ITPK1 | 0 | 1,75114 | inf | 0,035812 |
| Sb04g024090 | Protein NRT1/ PTR FAMILY 6.4 –NPF6.4 | 45,4655 | 4,44484 | -3,35457 | 0,022577 |
| Sb04g035560 | TPS11 – Trehalose-6-phosphatase synthase 11 | 76,4698 | 20,5569 | -1,89527 | 0,022577 |
| Sb04g021590 | Copper transport protein- CCH | 23,4383 | 170,208 | 2,86036 | 0,022577 |
| Sb04g027330 | heat shock protein- HSP23.5 | 52,6493 | 545,481 | 3,37304 | 0,022577 |
| - | NI | 0 | 21,772 | inf | 0,022577 |
| - | NI | 0 | 32,9927 | inf | 0,022577 |
| Sb05g007030 | heat shock protein –HSP22 | 0 | 5,28697 | inf | 0,022577 |
| Sb05g008440 | carboxylesterase 17 –CXE17 | 3,2307 | 0 | #NOME? | 0,022577 |
| - | NI | 0 | 5,99304 | inf | 0,022577 |
| - | NI | 0 | 5,65168 | inf | 0,022577 |
| - | NI | 0 | 4,18415 | inf | 0,035812 |
| Sb06g001410 | Pectate lyase 15 | 17,9248 | 83,0608 | 2,21221 | 0,022577 |
| Sb06g002500 | Hypothetical protein | 117,531 | 1082,81 | 3,20367 | 0,022577 |

“NI” means no identified; “inf” indicates no ratio.

**Table S3.** Continuation

| **GeneID** | **Annotation** | **ScGAIOE** | **HpScGAI** | **Fold change (Log2)** | **q-values** |
| --- | --- | --- | --- | --- | --- |
| Sb06g021870 | Leucine-rich repeat (LRR) family protein | 11,792 | 52,4498 | 2,15313 | 0,022577 |
| Sb06g024770 | Bifunctional inhibitor/lipid-transfer protein/seed storage 2S albumin superfamily protein –LTPL121 | 0 | 175,476 | inf | 0,022577 |
| Sb06g024780 | Bifunctional inhibitor/lipid-transfer protein/seed storage 2S albumin superfamily protein –LTPL120 | 0 | 16,2181 | inf | 0,022577 |
| Sb06g025890 | Ethylene-responsive transcription factor ERF025 (DREB A-4) | 7,01096 | 0 | inf | 0,022577 |
| Sb06g028200 | Bifunctional inhibitor/lipid-transfer protein/seed storage 2S albumin superfamily protein | 90,7623 | 463,277 | 2,35171 | 0,022577 |
| Sb06g000660 | Heat shock protein 90-1 – HSP90.1 | 32,6025 | 393,163 | 3,59207 | 0,022577 |
| - | NI | 35,2548 | 274,777 | 2,96237 | 0,022577 |
| - | NI | 450,491 | 3722,99 | 3,04689 | 0,022577 |
| - | NI | 224,836 | 1937,85 | 3,10751 | 0,022577 |
| - | NI | 215,998 | 1309,36 | 2,59977 | 0,035812 |
| - | NI | 144,461 | 1120,93 | 2,95594 | 0,022577 |
| - | NI | 0 | 107,561 | inf | 0,022577 |
| Sb07g020270 | TPS9 - Trehalose-6-phosphatase synthase 9 | 42,6613 | 3,28255 | -3,70004 | 0,022577 |
| Sb08g000980 | Peroxidase 52- PRX52 | 127,791 | 11,9137 | -3,42309 | 0,035812 |
| Sb08g002740 | CBL-interacting serine/threonine-protein kinase 2 – CIPK2 | 95,0556 | 26,1821 | -1,86019 | 0,035812 |
| Sb08g020600 | BZIP63- Basic leucine zipper 63 | 54,0344 | 9,3616 | -2,52905 | 0,022577 |
| Sb08g021580 | APG1 – Albino or pale green mutant 1 | 47,5267 | 6,52539 | -2,8646 | 0,022577 |
| Sb09g023060 | Pyruvate decarboxylase 1 –PDC1 | 1,95158 | 28,5127 | 3,86889 | 0,035812 |
| Sb09g029610 | ADPGLC-PPASE large subunit - APL2 | 44,3375 | 158,499 | 1,83788 | 0,022577 |
| Sb09g018080 | Transducin/WD-40 repeat-containing protein | 10,8563 | 40,7806 | 1,90935 | 0,022577 |
| Sb09g022260 | Unknown protein | 428 | 43,4989 | -3,29856 | 0,022577 |
| Sb09g024060 | KINβ1 - SNF1-related protein kinase regulatory subunit beta-1 | 226,435 | 38,5695 | -2,55356 | 0,022577 |
| Sb09g024230 | CYS6 - Cysteine proteinase inhibitor 6 | 63,9594 | 240,365 | 1,91 | 0,022577 |
| Sb09g029500 | PG2 - Polygalacturonase | 7,38358 | 47,9777 | 2,69997 | 0,022577 |
| - | NI | 0 | 76,565 | inf | 0,022577 |

“NI” means no identified; “inf” indicates no ratio.

**Table S4.** Composite list of DEGs in internode 9th between ScGAIOE and HpScGAI.

| **GeneID** | **Annotation** | **ScGAIOE** | **HpScGAI** | **Fold change (Log2)** | **q-values** |
| --- | --- | --- | --- | --- | --- |
| Sb01g000580 | GA20ox2 - Gibberellin 20 oxidase 2 | 1,48898 | 0 | inf | 0,009611 |
| Sb01g004295 | SMT1 – Sterol methyltransferase 1 | 61,391 | 0 | inf | 0,023238 |
| Sb01g007170 | ZAT6 - Zinc finger protein | 4,21876 | 75,7109 | 4,16561 | 0,023238 |
| Sb01g007340 | PP2C clade D5 – ADP5 | 30,8246 | 241,756 | 2,9714 | 0,009611 |
| Sb01g013190 | SPX (SYG1/Pho81/XPR1) domain-containing protein / zinc finger (C3HC4-type RING finger) protein-related | 5,91843 | 0 | inf | 0,009611 |
| Sb01g014350 | Cytochrome P450, family 87, subfamily A, polypeptide 2 – CYP87A2 | 12,3886 | 57,9573 | 2,22598 | 0,033482 |
| Sb01g020430 | Unknown protein | 129,822 | 16,4984 | -2,97613 | 0,009611 |
| Sb01g020570 | PHT1.4 -Inorganic phosphate transporter 1-4 | 16,15 | 82,9606 | 2,36089 | 0,023238 |
| Sb01g021130 | GDSL esterase/lipase EXL3 | 3,00806 | 0 | inf | 0,009611 |
| Sb01g027285 | PSBC - Photosystem II reaction center protein C | 0 | 15,7927 | inf | 0,033482 |
| Sb01g027810 | Early-responsive to dehydration – (ERD4) | 38,451 | 8,18857 | -2,23134 | 0,033482 |
| Sb01g029330 | EXPβ2 - Expansin-β2 | 3,53089 | 0 | inf | 0,017156 |
| Sb01g032610 | Terpene synthase –TPS21 | 15,0758 | 114,789 | 2,92867 | 0,009611 |
| Sb01g035970 | Putative uncharacterized protein | 2,17049 | 0 | inf | 0,037292 |
| Sb01g043030 | BGLU40 - Beta-glucosidase 40 | 1,65775 | 0 | inf | 0,017156 |
| Sb01g001160 | CYP71B23 - Cytochrome P450 | 1,13987 | 0 | inf | 0,023238 |
| Sb01g003270 | C2H2-type zinc finger family protein | 0 | 8,10497 | inf | 0,009611 |
| Sb01g003280 | C2H2-type zinc finger family protein | 0 | 8,15342 | inf | 0,009611 |
| Sb01g003710 | ATAF2 – NAC domain protein | 12,1639 | 161,214 | 3,7283 | 0,009611 |
| Sb01g004320 | Cupredoxin superfamily protein | 3,59622 | 0 | inf | 0,009611 |
| Sb01g004740 | AAA-ATPASE 1 | 25,9359 | 194,583 | 2,90736 | 0,009611 |
| Sb01g005900 | Syntaxin-121 | 11,6421 | 84,0838 | 2,85247 | 0,009611 |
| Sb01g007220 | Putative uncharacterized protein | 0 | 83,1714 | inf | 0,009611 |
| Sb01g008350 | BIL4 - BRZ-Insensitive-long hypocotyls 4 | 29,4707 | 285,007 | 3,27364 | 0,009611 |
| Sb01g010050 | Uncharacterized protein | 33,4779 | 220,235 | 2,71776 | 0,009611 |
| Sb01g013270 | YAB1 - Axial regulator YABBY 1 | 5,88927 | 0 | inf | 0,045876 |
| Sb01g014120 | SHY2/IAA3 - Auxin-responsive protein | 1,9053 | 0 | inf | 0,037292 |
| Sb01g015070 | Terpenoid cyclases | 0,980916 | 0 | inf | 0,037292 |
| Sb01g018360 | ABCG11 - ABC transporter G family member 11 | 1,18957 | 0 | inf | 0,017156 |
| Sb01g036020 | CBL-interacting serine/threonine-protein kinase 10 – CIPK10 | 53,221 | 10,0121 | -2,41025 | 0,029034 |
| Sb01g037090 | GOLS1 - Galactinol synthase 1 | 14,5121 | 85,3798 | 2,55664 | 0,009611 |
| Sb01g037850 | COBL7 - COBRA-like protein 7 | 5,25721 | 50,5362 | 3,26495 | 0,009611 |
| Sb01g038410 | AP2C1 - PP2C clade B | 18,8677 | 500,749 | 4,7301 | 0,009611 |

“inf” indicates no ratio.

**Table S4.** Continuation.

| **GeneID** | **Annotation** | **ScGAIOE** | **HpScGAI** | **Fold change (Log2)** | **q-values** |
| --- | --- | --- | --- | --- | --- |
| Sb01g039530 | HSP70 - Heat shock protein | 74,932 | 394,979 | 2,39812 | 0,009611 |
| Sb01g041310 | Glycosyl hydrolase family 10 | 1,31809 | 0 | inf | 0,009611 |
| Sb01g043460 | Uncharacterized protein | 57,5594 | 228,242 | 1,98744 | 0,029034 |
| - | NI | 29,0104 | 161,221 | 2,4744 | 0,009611 |
| Sb10g000980 | CSLD3 - Cellulose synthase-like protein D3 | 13,2009 | 76,3735 | 2,53243 | 0,009611 |
| Sb10g001620 | CBF3 - Dehydration-responsive element-binding protein 1A | 0 | 1,86575 | inf | 0,041518 |
| Sb10g003340 | GDSL esterase/lipase | 1,00144 | 0 | inf | 0,045876 |
| Sb10g003890 | GDSL esterase/lipase | 265,057 | 47,8687 | -2,46915 | 0,009611 |
| Sb10g012970 | Peptidyl-prolyl cis-trans isomerase FKBP65 – ROF2 | 23,5841 | 706,669 | 4,90515 | 0,009611 |
| Sb10g023970 | Uncharacterized protein | 86,9415 | 10,8877 | -2,99735 | 0,009611 |
| Sb10g025210 | LTPL129 - Protease inhibitor/seed storage/LTP family protein | 1,70765 | 0 | inf | 0,009611 |
| Sb10g027000 | Patellin-4 | 1,42238 | 0 | inf | 0,009611 |
| Sb10g000660 | Pectate lyase-like superfamily protein | 83,7454 | 16,5356 | -2,34043 | 0,009611 |
| Sb10g002070 | ADC2 - Arginine decarboxylase 2 | 8,75275 | 46,4398 | 2,40755 | 0,029034 |
| Sb10g004240 | UDGT71C5 - UDP-glycosyltransferase 71C5 | 1,09525 | 0 | inf | 0,037292 |
| Sb10g006630 | Putative uncharacterized | 6,03264 | 73,3782 | 3,60449 | 0,009611 |
| Sb10g008130 | FTSH6 - ATP-dependent zinc metalloprotease | 5,40909 | 33,3836 | 2,62568 | 0,029034 |
| Sb10g012220 | BGLU17 - Beta-glucosidase 17 | 50,3167 | 4,58139 | -3,45718 | 0,017156 |
| - | NI | 35,7038 | 0 | inf | 0,009611 |
| Sb02g009340 | Putative lipid-transfer protein DIR1 | 0 | 32,7424 | inf | 0,023238 |
| Sb02g022290 | WRKY53 | 3,48877 | 80,0604 | 4,5203 | 0,009611 |
| Sb02g028240 | SAP5 – Stress associated protein 5 | 23,4327 | 126,628 | 2,434 | 0,009611 |
| Sb02g033240 | xyloglucan endotransglucosylase/hydrolase protein 32 – XTH32 | 5,67153 | 0 | inf | 0,009611 |
| Sb02g035460 | O-Glycosyl hydrolases family 17 protein | 2,16182 | 0 | inf | 0,009611 |
| Sb02g001740 | Uncharacterized protein | 1,2766 | 0 | inf | 0,017156 |
| Sb02g004390 | ELIP1 - Early light-induced protein 1, chloroplastic | 0 | 6,35111 | inf | 0,009611 |
| Sb02g004670 | SHY2/IAA3 - Auxin-responsive protein | 20,1516 | 248,64 | 3,62509 | 0,009611 |
| Sb02g005780 | GALT6 – O-galactosyltransferase | 3,79149 | 29,0339 | 2,9369 | 0,033482 |
| Sb02g009600 | CRSP – CO2-response secreted protease | 49,9568 | 3,84074 | -3,70122 | 0,009611 |
| Sb02g023660 | Glycosyl hydrolase family 81 protein | 5,3742 | 38,8393 | 2,85339 | 0,009611 |
| Sb02g023910 | SAP12 – Stress associated protein 12 | 0 | 7,34847 | inf | 0,009611 |
| Sb02g031550 | Copper amine oxidase family protein | 0 | 6,2105 | inf | 0,009611 |
| Sb02g035930 | B-120 -G-type lectin S-receptor-like serine/threonine-protein kinase | 0 | 1,01966 | inf | 0,009611 |

“NI” means no identified; “inf” indicates no ratio.

**Table S4.** Continuation.

| **GeneID** | **Annotation** | **ScGAIOE** | **HpScGAI** | **Fold change (Log2)** | **q-values** |
| --- | --- | --- | --- | --- | --- |
| Sb02g036605 | Unknown protein | 0 | 7,34847 | inf | 0,009611 |
| Sb02g037350 | OSM34 -Osmotin-like protein | 1,52028 | 0 | inf | 0,033482 |
| Sb02g042280 | GDSL esterase/lipase | 2,92582 | 0 | inf | 0,009611 |
| Sb02g043060 | Putative uncharacterized protein | 2,41391 | 116,664 | 5,59484 | 0,009611 |
| - | NI | 0 | 68,2309 | inf | 0,023238 |
| Sb03g003000 | Unknown protein | 7,38097 | 43,0973 | 2,54571 | 0,037292 |
| Sb03g003530 | HSP17.6II - Heat shock | 18,5509 | 136,753 | 2,88201 | 0,009611 |
| Sb03g006880 | HSP18.2 - Heat shock | 149,763 | 1297,54 | 3,11503 | 0,009611 |
| Sb03g013210 | Peroxidase superfamily protein | 1,44158 | 0 | inf | 0,037292 |
| Sb03g026050 | Unknown protein | 2,10569 | 56,9051 | 4,75619 | 0,017156 |
| Sb03g029790 | EMB2742 – Embryo defective 2742 | 19,6885 | 1,34664 | -3,86992 | 0,023238 |
| Sb03g030340 | MAN7 - Mannan endo-1,4-beta-mannosidase 7 | 1,94234 | 0 | inf | 0,009611 |
| Sb03g037080 | ERF9 - Ethylene-responsive transcription factor 9 | 23,8588 | 173,638 | 2,86349 | 0,009611 |
| Sb03g038290 | EXPA8 – Expansin A8 | 9,11544 | 0 | inf | 0,009611 |
| Sb03g038880 | 2-oxoglutarate (2OG) and Fe(II)-dependent oxygenase superfamily protein | 1,81198 | 0 | inf | 0,009611 |
| Sb03g041100 | CP22 Photosystem II subunit S | 16,5613 | 131,253 | 2,98646 | 0,009611 |
| Sb03g003310 | Unknown protein | 3,70572 | 186,675 | 5,65463 | 0,009611 |
| Sb03g006870 | HSP18.2 - Heat shock | 254,858 | 1830,2 | 2,84424 | 0,009611 |
| Sb03g020184 | GRP1 – Glycine-rich RNA binding protein 1 | 5,2335 | 44,5266 | 3,08882 | 0,017156 |
| Sb03g025730 | Calmodulin-binding family protein | 1,92449 | 62,3619 | 5,01812 | 0,029034 |
| Sb03g029520 | AKT1 – K+ transporter | 1,90883 | 18,1015 | 3,24535 | 0,023238 |
| Sb03g032140 | MAPKKK17 - Mitogen-activated protein kinase kinase kinase 17 | 0 | 3,77935 | inf | 0,009611 |
| Sb03g034090 | OXS3 – Oxidative stress 3 | 57,4861 | 298,396 | 2,37594 | 0,009611 |
| Sb03g039330 | Pathogenesis-related thaumatin superfamily protein | 1,73687 | 0 | inf | 0,041518 |
| Sb03g040300 | HSPRO1 - Nematode resistance protein-like | 4,23374 | 88,2553 | 4,38168 | 0,017156 |
| Sb03g040950 | ASFT- Aliphatic suberin feruloyl-transferase | 2,04455 | 0 | inf | 0,009611 |
| Sb03g043430 | Unknown protein | 321,263 | 1793,6 | 2,48103 | 0,009611 |
| Sb03g045000 | Calcium-dependent lipid-binding (CaLB domain) family protein | 3,19283 | 57,1091 | 4,16081 | 0,041518 |
| - | NI | 0 | 50,8151 | inf | 0,041518 |
| - | NI | 0 | 16,6245 | inf | 0,009611 |
| Sb04g002950 | SRF1 - Strubbelig-receptor family 1 | 0,949692 | 0 | inf | 0,033482 |
| Sb04g005520 | WRKY40 | 7,67975 | 66,5328 | 3,11493 | 0,009611 |
| Sb04g008670 | Myb-like HTH transcriptional regulator-like protein | 1,26062 | 0 | inf | 0,017156 |

“NI” means no identified; “inf” indicates no ratio.

**Table S4.** Continuation.

| **GenID** | **Annotation** | **ScGAIOE** | **HpScGAI** | **Fold change (Log2)** | **q-values** |
| --- | --- | --- | --- | --- | --- |
| Sb04g009690 | UGT84B2 - UDP-glucosyl transferase 84B2 | 272,006 | 1080,61 | 1,99014 | 0,045876 |
| Sb04g026560 | PAL1 - Phenylalanine ammonia-lyase 1 | 2,70701 | 32,8481 | 3,60104 | 0,033482 |
| Sb04g028460 | GATL9 - Galacturonosyltransferase-like 9 | 7,07327 | 117,151 | 4,04985 | 0,009611 |
| Sb04g028490 | Actin-binding FH2 (formin homology 2) family protein | 5,46972 | 47,7885 | 3,12713 | 0,033482 |
| Sb04g028830 | SGNH hydrolase-type esterase superfamily protein | 5,40017 | 0 | inf | 0,009611 |
| Sb04g030080 | GALS1 – Galactan synthase 1 | 29,9729 | 162,196 | 2,43601 | 0,029034 |
| Sb04g032250 | ERD10 – Early responsive to dehydration 10 | 43,0117 | 201,862 | 2,23057 | 0,023238 |
| Sb04g032820 | EXPβ4 - Expansin-β4 | 1,83753 | 0 | inf | 0,009611 |
| Sb04g035630 | GAE1 - UDP-glucuronate 4-epimerase 1 | 6,30856 | 50,7312 | 3,00749 | 0,009611 |
| Sb04g035810 | BRS1 - BRI1 suppressor 1 | 2,83118 | 0 | inf | 0,009611 |
| Sb04g007190 | KCS11 - 3-ketoacyl-CoA synthase 11 | 4,05567 | 41,0833 | 3,34054 | 0,009611 |
| Sb04g007230 | UGT73C6 - UDP-glycosyltransferase 73C6 | 1,03048 | 0 | inf | 0,041518 |
| Sb04g008110 | Leucine-rich repeat receptor-like protein kinase | 36,2994 | 3,48495 | -3,38073 | 0,009611 |
| Sb04g015420 | SWEET7 - Bidirectional sugar transporter | 212,628 | 50,4851 | -2,0744 | 0,037292 |
| Sb04g027330 | HSP20 - Heat shock protein | 21,7175 | 429,757 | 4,30659 | 0,009611 |
| Sb04g029960 | XCP1 - Xylem cysteine proteinase 1 | 14,063 | 0 | inf | 0,009611 |
| Sb04g032830 | EXPβ4 - Expansin-β4 | 9,63691 | 0 | inf | 0,009611 |
| Sb04g033150 | DALL1 - Phospholipase A1-Ibeta2 | 5,62398 | 65,7296 | 3,54688 | 0,009611 |
| Sb04g036920 | PPPDE putative thiol peptidase family protein | 39,4882 | 297,702 | 2,91438 | 0,009611 |
| - | NI | 0 | 28,1379 | inf | 0,009611 |
| Sb05g002640 | Ankyrin repeat-containing protein | 3,95258 | 82,5697 | 4,38475 | 0,009611 |
| Sb05g017960 | HSD1 - 11-beta-hydroxysteroid dehydrogenase 1B | 2,19215 | 0 | inf | 0,009611 |
| Sb05g019180 | TPS21 - Terpene synthase | 0 | 4,2059 | inf | 0,009611 |
| Sb05g022580 | Subtilisin-like protease | 2,5171 | 0 | inf | 0,009611 |
| Sb05g022620 | Subtilisin-like protease | 90,7985 | 9,38795 | -3,27379 | 0,009611 |
| - | NI | 0 | 6,62481 | inf | 0,009611 |
| - | NI | 0 | 12,8641 | inf | 0,009611 |
| - | NI | 0 | 20,9474 | inf | 0,029034 |
| Sb06g001970 | APX3- Ascorbate peroxidase 3 | 0 | 8,9377 | inf | 0,009611 |
| Sb06g002500 | Unknown protein | 373,849 | 0 | inf | 0,009611 |
| Sb06g024110 | Homeodomain-like superfamily protein | 16,6101 | 175,367 | 3,40025 | 0,009611 |
| Sb06g025870 | MATE efflux family protein | 4,61271 | 41,5433 | 3,17093 | 0,029034 |
| Sb06g028090 | ERF7 - Ethylene-responsive transcription factor 7 | 6,68328 | 101,31 | 3,92208 | 0,009611 |

“NI” means no identified; “inf” indicates no ratio.

**Table S4.** Continuation.

| **GeneID** | **Annotation** | **ScGAIOE** | **HpScGAI** | **Fold change (Log2)** | **q-values** |
| --- | --- | --- | --- | --- | --- |
| Sb06g033520 | CCR4-associated factor 1B | 6,62306 | 120,969 | 4,191 | 0,009611 |
| Sb06g000660 | HSP90.1 - Heat shock | 19,1757 | 356,74 | 4,21752 | 0,009611 |
| Sb06g015940 | XTH25 - Xyloglucan endotransglucosylase/hydrolase protein 25 | 15,8663 | 106,42 | 2,74573 | 0,009611 |
| Sb06g022880 | GA2OX8 - Gibberellin 2-beta-dioxygenase 8 | 0 | 2,33684 | inf | 0,017156 |
| Sb06g025170 | CYP86A4 - Cytochrome P450 86A4 | 1,06864 | 0 | inf | 0,023238 |
| Sb06g026160 | ACS6 - 1-aminocyclopropane-1-carboxylate synthase 6 | 2,62987 | 46,1604 | 4,13359 | 0,009611 |
| Sb06g031300 | Peroxidase superfamily protein | 1,4164 | 0 | inf | 0,017156 |
| Sb06g033570 | NDR1/HIN1-LIKE 2 | 59,3943 | 275,639 | 2,21438 | 0,023238 |
| - | NI | 164,003 | 0 | inf | 0,037292 |
| - | NI | 64,7768 | 0 | inf | 0,009611 |
| - | NI | 1037,36 | 0 | inf | 0,009611 |
| - | NI | 532,815 | 0 | inf | 0,009611 |
| - | NI | 173,809 | 0 | inf | 0,009611 |
| - | NI | 325,53 | 0 | inf | 0,009611 |
| - | NI | 421,92 | 0 | inf | 0,009611 |
| - | NI | 18,1711 | 0 | inf | 0,037292 |
| Sb07g000510 | CYP71B34 - Cytochrome P450 71B34 | 1,92836 | 0 | inf | 0,017156 |
| Sb07g023030 | ERF109 - Ethylene-responsive transcription factor109 | 0 | 5,07173 | inf | 0,023238 |
| Sb07g001090 | Core-2/I-branching beta-1,6-N-acetylglucosaminyltransferase family protein | 18,7012 | 231,186 | 3,62785 | 0,009611 |
| Sb07g009580 | Eukaryotic aspartyl protease family protein | 0,835311 | 0 | inf | 0,045876 |
| Sb07g020270 | TPS9 - Trehalose-6-phosphatase synthase 9 | 31,7242 | 5,11352 | -2,63319 | 0,045876 |
| Sb07g023210 | PLP2 - Patatin-like protein 2 | 0 | 0,903477 | inf | 0,041518 |
| Sb07g023340 | UCP5 - Mitochondrial uncoupling protein 5 | 32,0565 | 198,451 | 2,6301 | 0,009611 |
| Sb08g004980 | AAP3 - Amino acid permease 3 | 6,62457 | 49,2703 | 2,89482 | 0,017156 |
| Sb08g005680 | HXXXD-type acyl-transferase family protein | 1,39852 | 0 | inf | 0,037292 |
| Sb08g015237 | CRK10 - Cysteine-rich receptor-like protein kinase 10 | 1,52622 | 0 | inf | 0,033482 |
| Sb08g004960 | AAP3 - Amino acid permease 3 | 9,06995 | 79,2295 | 3,12687 | 0,009611 |
| Sb08g021800 | LATE FLOWERING | 6,28197 | 0 | inf | 0,009611 |
| Sb08g022450 | OSM34 – Osmotin 34 | 1,56038 | 0 | inf | 0,041518 |
| - | NI | 0 | 26,0123 | inf | 0,009611 |
| - | NI | 0 | 16,652 | inf | 0,041518 |
| Sb09g002390 | TZF9 – Tandem Zinc finger protein 9 | 19,2684 | 164,072 | 3,09002 | 0,009611 |
| Sb09g003230 | Phosphoglycerate mutase family protein | 41,2426 | 197,18 | 2,25731 | 0,033482 |

“NI” means no identified; “inf” indicates no ratio.

**Table S4.** Continuation.

| **GeneID** | **Annotation** | **ScGAIOE** | **HpScGAI** | **Fold change (Log2)** | **q-values** |
| --- | --- | --- | --- | --- | --- |
| Sb09g006030 | PFK3 - Phosphofructokinase 3 | 0 | 7,30325 | inf | 0,009611 |
| Sb09g015900 | WRKY33 | 5,95004 | 64,2507 | 3,43274 | 0,009611 |
| Sb09g017190 | Glycine-rich protein family | 8,96748 | 0 | inf | 0,009611 |
| Sb09g023380 | ARM repeat superfamily protein | 1,51129 | 75,3009 | 5,63881 | 0,009611 |
| Sb09g025090 | Protein of unknown function (DUF567) | 0 | 2,78348 | inf | 0,033482 |
| Sb09g026830 | WRKY51 | 5,3416 | 49,6088 | 3,21525 | 0,009611 |
| Sb09g000270 | CYP722A1 - Cytochrome P450, family 722, subfamily A, polypeptide 1 | 33,9448 | 5,2331 | -2,69745 | 0,045876 |
| Sb09g003060 | RCI2A - Rare-cold-inducible 2a | 99,5521 | 501,7 | 2,3333 | 0,037292 |
| Sb09g005340 | Unknown protein | 0 | 16,4329 | inf | 0,009611 |
| Sb09g019930 | PPDK - Pyruvate orthophosphate dikinase 1 | 29,8375 | 129,252 | 2,11498 | 0,023238 |
| Sb09g022260 | Unknown protein | 765,238 | 75,2771 | -3,34562 | 0,009611 |
| Sb09g027360 | PMEAMT - Phosphomethylethanolamine N-methyltransferase | 98,5499 | 6,18125 | -3,99488 | 0,009611 |
| Sb09g029130 | CTP synthase | 56,7059 | 14,5123 | -1,96622 | 0,037292 |
| Sb09g029575 | RL6 - Protein RADIALIS-like 6 | 24,0965 | 0 | inf | 0,033482 |
| Sb09g029860 | LEA27 – Late embryogenesis abundant 27 | 85,0088 | 516,241 | 2,60236 | 0,009611 |
| - | NI | 0 | 62,1164 | inf | 0,029034 |

“NI” means no identified; “inf” indicates no ratio.

**Table S5.** Primers used in this study.

| **Primer** | **Sequences** | **Used for** |
| --- | --- | --- |
|  |  |  |
| ScUbi-1_fw | 5’-CCGGTCCTTTAAACCAACTCAGT-3’ | cDNA |
| ScUbi-1_rev | 5’-CCCTCTGGTGTACCTCCATTTG-3’ |
| ScGAI_fw | 5’-CATATGAAGCGCGAGTACCAAGACGC-3’ | Cloning and YTH |
| ScGAI_rev | 5’-CTGCAGCCCCACCCCTCGATCAC-3’ |
| ScPIF3_fw | 5’- CATATGTCCGACGGCAACGAGT -3’ | Cloning and YTH |
| ScPIF3_rev | 5’-CTCGAGGCTGACTGTTTTTATGTTTCAGCT-3’ |
| ScPIF4_fw | 5’- CATatggaCGGCAATgcgag-3’ | Cloning and YTH |
| ScPIF4_rev | 5’-GAGCTCTTACGAGATTTTCCTCATTCTAAAC-3’ |
| ScPIF5_fw | 5’-CgcccCATatgaaccaG-3’ | Cloning and YTH |
| ScPIF5_rev | 5’- GGATCCATCAACCTAACACCATCATATCA-3’ |
| ScGAI_fw | 5’-TCTAGAATGAAGCGCGAGTACCAAGACGC-3’ | BIFC |
| ScGAI_rev | 5’-CCCGGGCCCACCCCTCGACGGAGC-3’ |
| ScGAI_trunc_fw | 5’-TCTAGAATGCGCAAGGTCGCCGCCTACTT-3’ | BIFC |
| ScPIF3_fw | 5’- TCTAGAATGTCCGACGGCAACGAGT -3’ |
| ScPIF3_rev | 5’-GTCGACTGTTTCAGCTTCATTTCTTCC-3’ | BIFC |
| ScPIF4_fw | 5’- TCTAGAatggaCGGCAATgcgag-3’ |
| ScPIF4_rev | 5’-GTCGACAACTCCAAAAGTAGGTGG-3’ | BIFC |
| oxScGAI_fw | 5’-GATATCGTAAACCATGGACTACAAGGACGACGATGACAAAATGAAGCGCGAGTACCAAGACGC-3’ | ScGAI overexpressing |
| oxScGAI_rev | 5’-GGGGTACCCCCCACCCCTCGATCAC-3’ |
| asScGAI_fw | 5’-CGGGATCCGGATGACGACGAGGAAGAGGAA-3’ | ScGAI silencing |
| asScGAI_rev | 5’-GGCCAGATATCGAGGAGATGGACGAGATGCT-3’ |
| sScGAI_fw | 5’-CGACGCGTCGAGGAGATGGACGAGATGCT-3’ | ScGAI silencing |
| sScGAI_rev | 5’-GGGGTACCCCGGATGACGACGAGGAAGAGGAA-3’ |
| IntronII_fw | 5’-GGCCAGATATCATGCGGTAACTGATCTGAATT-3’ | ScGAI silencing |
| IntronII_rev | 5’-CGACGCGTCACCTGCAGAGTGTGTAGATAA-3’ |
| ScEIN3_fw | 5’-AAAATCTAGAATGATGGGAGGCGGGCTGATGA-3’ | Cloning and BIFC |
| ScEIN3_rev | 5’-AAAACCCGGGGTAGAACCAATTGGTCCCGTCGT-3’ |
| ScEIL1_fw | 5’-AAAATCTAGATACCTCTACGCTCGGCGTGATG-3’ | Cloning and BIFC |
| ScEIL1_rev | 5’-AAAACCCGGGATTCTGCCGCAGGTAGAACCAATT-3’ |
| ScEIN3_fw | 5’-AAAACATATGATGGGAGGCGGGCTGATGA -3’ | YTH |
| ScEIN3_rev | 5’-AAAACTCGAGTCAGTAGAACCAATTGGTCCCGT -3’ |
| ScEIL1_fw | 5’-AAAACATATGATGGGAGGAAGAGGGGC -3’ | YTH |
| ScEIL1_rev | 5’-AAAAGAATTCTCAGTAGAACCAATTGGCGTTGGAT -3’ |

**Table S5.** Continuation.

| **Primer** | **Sequences** | **Used for** |
| --- | --- | --- |
| ScEIN3_tr_fw | 5’-CATATGATGCAGCACTGTGACCCCCCACAG -3’ | YTH |
| ScEIN3_tr_rev | 5’-GAATTCTCActggggcatggcattaggcctctc -3’ |
| ScGAI_SAW_fw | 5’-GCTGGCACTCTTCAACG-3’ | Arabidopsis screening |
| VENUS_rev | 5’- CCAGCTCGACCAGGATG-3’ |
| βactin2_fw | 5’-TTCTCTCCTTGTACGCC -3’ | Arabidopsis screening |
| βactin2_rev | 5’- AACGATTCCTGGACCTGCCTCATC-3’ |
| ScPIF3_fw | 5’- GAATTCATGTCCGACGGCAACGAGT -3’ | Subcellular localization |
| ScPIF3_rev | 5’-AAGCTTTGTTTCAGCTTCATTTCTTCC-3’ |
| ScPIF4_fw | 5’- AAGCTTATGGACGGCAATGCGAG-3’ | Subcellular localization |
| ScPIF4_rev | 5’-AAGCTTAACTCCAAAAGTAGGTGG-3’ |
| Ubi1_intron_fw | 5’-ttgtcgatgctcaccctgttgtttg-3’ | Genotype screening |
| ScGAI_rev | 5’-gggagatcgaagtagccagc-3’ |
| ScGAI_fw | 5’- caccgtgcactacaatccct-3’ |
| qUTR_della_fw | 5’-CACCTCCGCTTCAAGGTC-3’ | qPCR |
| qUTR_della_rev | 5’-CTTGGTACTCGCGCTTCAT-3’ |
| qDELLA_fw | 5’-CCAAGGACAAGATGATGGTG-3’ | qPCR |
| qDELLA_rev | 5’-GACGAACGCACCTTGTACC-3’ |
